# Supplementary material for: LAST, a c-Myc-inducible long noncoding RNA, cooperates with CNBP to promote CCND1 mRNA stability in human cells
Source: eLife. 2017 Dec 4;6:e30433. doi: 10.7554/eLife.30433 (PMC5739540; doi:10.7554/eLife.30433)
Supplement: Figure 1—source data 1. [file elife-30433-fig1-data1.xlsx]

## Sheet: Figure 1A
		lncRNA-5639	lncRNA-51	lncRNA-52	lncRNA-5630	lncRNA-5690	CDK4
1	Doxcycline 0H	1	1	1	1	1	1
	Doxcycline 24H	0.606061	0.0669858	0.248273	1.61328	1.18921	0.223756
2	Doxcycline 0H	1	1	1	1	1	1
	Doxcycline 24H	0.864537	0.186856	0.14161	1.04972	1.31039	0.157127
3	Doxcycline 0H	1	1	1	1	1	1
	Doxcycline 24H	0.46729	0.147671	0.104386	0.907519	0.790041	0.15932
AVERAGE	Doxcycline 0H	1	1	1	1	1	1
	Doxcycline 24H	0.645963	0.133838	0.164757	1.19017	1.09655	0.180068
STDEV	Doxcycline 0H	0	0	0	0	0	0
	Doxcycline 24H	0.201607	0.0611207	0.0746839	0.373258	0.27227	0.0378513
P-value		p>0.05	p<0.001	p<0.001	p>0.05	p>0.05	p<0.001
		NS	***	***	NS	NS	***

## Sheet: Figure 1B
1	sh-ctrl	1			1	sh-ctrl	1
	sh-lncRNA-52-1	0.282257				sh-lncRNA-51-1	0.124137
	sh-lncRNA-52-2	0.328982				sh-lncRNA-51-2	0.25349
2	sh-ctrl	1			2	sh-ctrl	1
	sh-lncRNA-52-1	0.289172				sh-lncRNA-51-1	0.234881
	sh-lncRNA-52-2	0.15283				sh-lncRNA-51-2	0.336808
3	sh-ctrl	1			3	sh-ctrl	1
	sh-lncRNA-52-1	0.204476				sh-lncRNA-51-1	0.281265
	sh-lncRNA-52-2	0.301452				sh-lncRNA-51-2	0.351111
AVERAGE		1			AVERAGE		1
		0.258635					0.213427
		0.261088					0.313803
STDEV		0			STDEV		0
		0.0470306					0.080731
		0.0947593					0.0527201
P-value		p<0.01	sh-lncRNA-52-1 vs sh-ctrl	**	P-value		p<0.001	sh-lncRNA-51-1 vs sh-ctrl	***
		p<0.01	sh-lncRNA-52-2 vs sh-ctrl	**			p<0.001	sh-lncRNA-51-2 vs sh-ctrl	***

## Sheet: Figure 1D
1	sh-ctrl	159
	sh-lncRNA-52-1	43
	sh-lncRNA-52-2	18
	sh-lncRNA-51-1	119
	sh-lncRNA-51-2	129
2	sh-ctrl	177
	sh-lncRNA-52-1	34
	sh-lncRNA-52-2	19
	sh-lncRNA-51-1	110
	sh-lncRNA-51-2	138
3	sh-ctrl	232
	sh-lncRNA-52-1	40
	sh-lncRNA-52-2	20
	sh-lncRNA-51-1	188
	sh-lncRNA-51-2	190
AVERAGE		189.333
		39
		19
		139
		152.333
STDEV		38.0307
		4.58258
		1
		42.6732
		32.9292
P-value		p<0.05	sh-lncRNA-52-1 vs sh-ctrl			*
		p<0.05	sh-lncRNA-52-2 vs sh-ctrl			*
		p>0.05	sh-lncRNA-51-1 vs sh-ctrl			NS
		p>0.05	sh-lncRNA-51-2 vs sh-ctrl			NS

## Sheet: Figure 1G
Relative RNA level in HCT116						Relative RNA level in H1299
		cytoplasm	nucleus
1	actin	0.821262	0.178738			1	actin	0.849779	0.150221
	U1	0.0747355	0.925264				U1	0.0833032	0.916697
	LAST	0.736112	0.263888				LAST	0.883293	0.116707
2	actin	0.948058	0.0519421			2	actin	0.925264	0.0747355
	U1	0.0921731	0.907827				U1	0.129413	0.870587
	LAST	0.607468	0.392532				LAST	0.877454	0.122546
3	actin	0.85415	0.14585			3	actin	0.904287	0.0957126
	U1	0.14243	0.85757				U1	0.121803	0.878197
	LAST	0.633575	0.366425				LAST	0.855868	0.144132
AVERAGE		0.87449	0.12551			AVERAGE		0.89311	0.10689
		0.103113	0.896887					0.111506	0.888494
		0.659052	0.340948					0.872205	0.127795
STDEV		0.0657995	0.0657995			STDEV		0.0389643	0.0389643
		0.0351483	0.0351483					0.0247194	0.0247194
		0.0680007	0.0680007					0.0144462	0.0144462

## Sheet: Figure 1H
	HAFF	IMR90	MCF10A	HCT116	MCF7	H1299
1	8.62782	16.0425	64.2054	65.5619	118.554	187.79
2	9.84934	15.9311	59.4674	74.3243	119.383	194.449
3	10.0574	15.4931	62.0067	81.9415	127.111	193.099
AVERAGE	9.51153	15.8222	61.8932	73.9426	121.682	191.78
STDEV	0.772355	0.290415	2.37107	8.19646	4.71918	3.52009

## Sheet: Figure 1I
	HCT116		H1299		MCF10A
	sh-ctrl	sh-c-Myc	sh-ctrl	sh-c-Myc	sh-ctrl	sh-c-Myc
1	1	0.360982	1	0.421596	1	0.19751
2	1	0.179244	1	0.305666	1	0.291183
3	1	0.225313	1	0.272833	1	0.175556
AVERAGE	1	0.25518	1	0.333365	1	0.221416
STDEV	0	0.0944786	0	0.0781538	0	0.0614091
P-value		p<0.001		p<0.001		p<0.01
		***		***		**
		sh-c-Myc vs sh-ctrl		sh-c-Myc vs sh-ctrl		sh-c-Myc vs sh-ctrl

## Sheet: Figure 1J
	HCT116		H1299		MCF10A
	ctrl	c-Myc	ctrl	c-Myc	ctrl	c-Myc
1	1	1.40444	1	4.75683	1	1.84038
2	1	1.39474	1	3.50642	1	2.15846
3	1	1.25701	1	3.81055	1	1.94531
AVERAGE	1	1.35207	1	4.0246	1	1.98138
STDEV	0	0.0824619	0	0.652105	0	0.162079
P-value		p<0.05		p<0.01		p<0.05
		*		**		*
		c-Myc vs ctrl		c-Myc vs ctrl		c-Myc vs ctrl

## Sheet: Figure 1K
		a	b	c	d	e	f	g	h	GAPDH
1	normal rabbit IgG	0.483614	0.26278	0.595399	0.406669	0.390103	0.245183	0.551689	0.818996	0.193704
	c-Myc antibody	0.457527	0.387409	2.5349	1.34904	0.625	0.246888	0.191038	0.540336	0.220971
2	normal rabbit IgG	0.279695	0.351581	0.698304	0.374212	0.295643	0.275845	0.392817	0.49721	0.384733
	c-Myc antibody	0.264608	0.193704	2.58816	0.836205	0.250334	0.325771	0.19915	0.243489	0.2836
3	normal rabbit IgG	0.213444	0.629347	0.384733	0.250334	0.540336	0.473661	0.40386	0.266448	0.170983
	c-Myc antibody	0.18453	0.52556	1.94791	0.853775	0.583146	0.0464534	0.14885	0.207607	0.0630189
AVERAGE		0.325584	0.414569	0.559479	0.343739	0.408694	0.331563	0.449455	0.527552	0.249807
		0.302222	0.368891	2.35699	1.01301	0.48616	0.206371	0.179679	0.330477	0.189196
STDEV		0.14081	0.191229	0.159842	0.0825023	0.123401	0.124012	0.0887092	0.27752	0.1174
		0.140331	0.166701	0.355273	0.291143	0.2053	0.143999	0.0270054	0.182626	0.113671
P-value		P>0.05	P>0.05	p<0.05	p<0.05	P>0.05	P>0.05	P>0.05	P>0.05	P>0.05
		NS	NS	*	*	NS	NS	NS	NS	NS

## Sheet: Figure 1L
	pGL3		pGL3-BS2		pGL3-BS2M		pGL3-BS3		pGL3-BS3M
	ctrl	c-Myc	ctrl	c-Myc	ctrl	c-Myc	ctrl	c-Myc	ctrl	c-Myc
1	1	1.22083	1	1.8859	1	1.11673	1	1.92593	1	1.05556
2	1	1.07143	1	2.06752	1	1.15071	1	1.825	1	0.866667
3	1	0.985294	1	1.70537	1	0.892749	1	1.65468	1	1.09489
AVERAGE	1	1.09252	1	1.88626	1	1.05339	1	1.80187	1	1.0057
STDEV	0	0.119177	0	0.181077	0	0.140155	0	0.137096	0	0.122006
P-value		P>0.05		p<0.05		P>0.05		p<0.05		P>0.05
		NS		*		NS		*		NS
