# Supplementary material for: LAST, a c-Myc-inducible long noncoding RNA, cooperates with CNBP to promote CCND1 mRNA stability in human cells
Source: eLife. 2017 Dec 4;6:e30433. doi: 10.7554/eLife.30433 (PMC5739540; doi:10.7554/eLife.30433)
Supplement: Figure 2—source data 1. [file elife-30433-fig2-data1.xlsx]

## Sheet: Figure2A
		52	CCND1	CCNE1	CDK2	CDK4	c-Myc
1	sh-ctrl	1	1	1	1	1	1
	sh-LAST-1	0.336808	0.273573	1.45397	1.23114	1.22264	1.18921
	sh-LAST-2	0.289172	0.486327	0.882703	0.806642	1.02811	0.752623
2	sh-ctrl	1	1	1	1	1	1
	sh-LAST-1	0.173139	0.547147	1.31951	1.01396	0.946058	1.22264
	sh-LAST-2	0.257028	0.482968	0.926588	0.806642	1.06437	1.18099
3	sh-ctrl	1	1	1	1	1	1
	sh-LAST-1	0.233258	0.376312	1.12506	1.10191	1.13288	1.1487
	sh-LAST-2	0.291183	0.408951	0.76313	1.04972	1.23971	1
AVERAGE		1	1	1	1	1	1
		0.247735	0.399011	1.29951	1.11567	1.10053	1.18685
		0.279128	0.459416	0.857474	0.887667	1.11073	0.977872
STDEV		0	0	0	0	0	0
		0.0827897	0.138192	0.165366	0.109245	0.141102	0.0370273
		0.0191651	0.0437358	0.0845994	0.140339	0.113159	0.21504
p-value		p<0.01,**	p<0.05,*	p>0.05,NS	p>0.05,NS	p>0.05,NS	p>0.05,NS
		p<0.001,***	p<0.01,**	p>0.05,NS	p>0.05,NS	p>0.05,NS	p>0.05,NS

## Sheet: Figure2C
	Relative mRNA level of CCND1							Relative mRNA level of LAST
	HAFF		H1299					HAFF		H1299
	sh-ctrl	sh-LAST-1	sh-ctrl	sh-LAST-1				sh-ctrl	sh-LAST-1	sh-ctrl	sh-LAST-1
1	1	0.323088	1	0.0703162			1	1	0.334482	1	0.255253
2	1	0.373712	1	0.125			2	1	0.435275	1	0.142595
3	1	0.562529	1	0.228458			3	1	0.473029	1	0.243164
AVERAGE	1	0.419777	1	0.141258				1	0.414262	1	0.213671
STDEV	0	0.126192	0	0.0803146				0	0.0716239	0	0.0618491
p-value		p<0.05,*		p<0.01,**					p<0.01,**		p<0.01,**

## Sheet: Figure2D
	Relative mRNA level of CCND1							Relative mRNA level of LAST
	HCT116		H1299		HAFF			HCT116		H1299		HAFF
	ctrl	LAST	ctrl	LAST	ctrl	LAST		ctrl	LAST	ctrl	LAST	ctrl	LAST
1	1	1.53688	1	1.39474	1	3.05252		1	430.539	1	377.413	1	1355.9
2	1	1.75321	1	1.61328	1	2.26577		1	421.679	1	359.538	1	1109
3	1	1.79005	1	1.52626	1	2.65737		1	515.561	1	382.681	1	1101.33
AVERAGE	1	1.69338	1	1.51143	1	2.65855		1	455.926	1	373.211	1	1188.74
STDEV	0	0.136782	0	0.110022	0	0.393377		0	51.8351	0	12.1305	0	144.814
p-value		p<0.001,***		p<0.01,**		p<0.05,*			p<0.01,**		p<0.001,***		p<0.001,***
