# Supplementary material for: LAST, a c-Myc-inducible long noncoding RNA, cooperates with CNBP to promote CCND1 mRNA stability in human cells
Source: eLife. 2017 Dec 4;6:e30433. doi: 10.7554/eLife.30433 (PMC5739540; doi:10.7554/eLife.30433)
Supplement: Figure 3—source data 1. [file elife-30433-fig3-data1.xlsx]

## Sheet: Figure3A
	Actinomycin D (h)	0	2	4	6
1	sh-ctrl	1	0.846442	0.59622	0.446024
	sh-LAST-1	1	0.604921	0.378635	0.290903
	sh-LAST-2	1	0.554757	0.463294	0.234881
2	sh-ctrl	1	0.895025	0.712025	0.426317
	sh-LAST-1	1	0.550953	0.339151	0.169576
	sh-LAST-2	1	0.583761	0.435989	0.23707
3	sh-ctrl	1	0.849533	0.619743	0.416553
	sh-LAST-1	1	0.548385	0.324346	0.195449
	sh-LAST-2	1	0.55534	0.441351	0.239816
AVERAGE		1	0.863667	0.642663	0.429632
		1	0.568086	0.347378	0.218642
		1	0.564619	0.446878	0.237256
STDEV		0	0.027201	0.0612101	0.0150121
		0	0.0319254	0.0280637	0.0639024
		0	0.0165798	0.0144673	0.00247288
p-value			p<0.01,**	p<0.05,*	p<0.01,**	sh-LAST-1 vs sh-ctrl
			p<0.01,**	p<0.05,*	p<0.001,***	sh-LAST-2 vs sh-ctrl

## Sheet: Figure3B
	Actinomycin D (h)	0	3	6	9
1	ctrl	1	0.752623	0.424463	0.230047
	LAST	1	0.907519	0.768438	0.435275
2	ctrl	1	0.753517	0.443094	0.22877
	LAST	1	0.885318	0.75187	0.508081
3	ctrl	1	0.766582	0.376312	0.295277
	LAST	1	0.856141	0.768292	0.59122
AVERAGE		1	0.757574	0.414623	0.251365
		1	0.882993	0.762867	0.511525
STDEV		0	0.0078136	0.0344616	0.0380345
		0	0.0257681	0.00952362	0.0780292
p-value			p<0.05,*	p<0.01,**	p<0.05,*

## Sheet: Figure3C
	LAST	CCND1 mRNA	CCNB1 mRNA
1	1	1	1
	11.2356	2.9897	0.624165
2	1	1	1
	12.295	2.37841	0.602904
3	1	1	1
	12.3805	2.47942	1.29235
AVERAGE	1	1	1
	11.9704	2.61584	0.839807
STDEV	0	0	0
	0.637791	0.327683	0.39206
p-value	p<0.001,***	p<0.01,**	p>0.05,NS

## Sheet: Figure3D
	LAST		CCND1 mRNA
	CCND1 sense DNA probe	CCND1 antisense DNA probe	CCND1 sense DNA probe	CCND1 antisense DNA probe
1	1	3.94493	1	3.75809
2	1	2.54912	1	5.31474
3	1	2.82843	1	4.34694
AVERAGE	1	3.10749	1	4.47326
STDEV	0	0.738566	0	0.785976
p-value		p<0.01,**		p<0.05,*

## Sheet: Figure3E
	LAST		CCND1 mRNA
	IgG2a	CNBP antibody	IgG2a	CNBP antibody
1	1	2	1	2.2974
2	1	2.9897	1	2.14355
3	1	3.5801	1	2.26577
AVERAGE	1	2.8566	1	2.23557
STDEV	0	0.798415	0	0.0812487
p-value		p<0.05,*		p<0.01,**

## Sheet: Figure3F
	CCND1	CNBP
1	1	1
	0.628507	0.121582
2	1	1
	0.632878	0.346277
3	1	1
	0.550953	0.144586
AVERAGE	1	1
	0.604113	0.204148
STDEV	0	0
	0.0460897	0.123624
p-value	p<0.01,**	p<0.05,*

## Sheet: Figure3G
	Actinomycin D (h)	0	2	4	6
	sh-ctrl	1	0.812252	0.554785	0.378929
	sh-CNBP	1	0.628507	0.303549	0.170755
	sh-ctrl	1	0.848989	0.598014	0.446918
	sh-CNBP	1	0.543367	0.244855	0.176579
	sh-ctrl	1	0.852089	0.621608	0.417388
	sh-CNBP	1	0.537523	0.361095	0.188227
AVERAGE		1	0.837777	0.591469	0.414412
		1	0.569799	0.303166	0.17852
STDEV		0	0.0221591	0.0338891	0.0340918
		0	0.0509261	0.0581208	0.00889617
p-value			p<0.05,*	p<0.05,*	p<0.01,**

## Sheet: Figure3H
		LAST	CNBP mRNA
1	sh-ctrl	1	1
	sh-LAST-1	0.181747	1.42405
	sh-LAST-2	0.279322	0.752623
2	sh-ctrl	1	1
	sh-LAST-1	0.293209	0.840896
	sh-LAST-2	0.200267	0.933033
3	sh-ctrl	1	1
	sh-LAST-1	0.219151	1.17283
	sh-LAST-2	0.287175	1.03526
AVERAGE		1	1
		0.231369	1.14593
		0.255588	0.906974
STDEV		0	0
		0.0567266	0.292507
		0.0480696	0.143111
p-value		p<0.01,**	p>0.05,NS	sh-LAST-1 vs sh-ctrl
		p<0.01,**	p>0.05,NS	sh-LAST-2 vs sh-ctrl

## Sheet: Figure3I
		CCND1 mRNA	LAST
1	sh-ctrl + CCND1 sense DNA probe	1	1
	sh-ctrl + CCND1 antisense DNA probe	4.89056	1.87905
	sh-CNBP + CCND1 sense DNA probe	0.456916	0.68302
	sh-CNBP + CCND1 antisense DNA probe	4.50023	1.04247
2	sh-ctrl + CCND1 sense DNA probe	1	1
	sh-ctrl + CCND1 antisense DNA probe	4.56305	3.27161
	sh-CNBP + CCND1 sense DNA probe	0.858565	1.39474
	sh-CNBP + CCND1 antisense DNA probe	4.95883	1.09429
3	sh-ctrl + CCND1 sense DNA probe	1	1
	sh-ctrl + CCND1 antisense DNA probe	4.59479	2.69447
	sh-CNBP + CCND1 sense DNA probe	0.864537	0.460094
	sh-CNBP + CCND1 antisense DNA probe	3.03143	1.1487
AVERAGE		1	1
		4.6828	2.61504
		0.726673	0.845953
		4.1635	1.09515
STDEV		0	0
		0.180622	0.699671
		0.233636	0.488163
		1.00686	0.0531215
p-value		p<0.001,***	p<0.05,*	(sh-ctrl + CCND1 antisense DNA probe) vs (sh-ctrl + CCND1 sense DNA probe)
		p<0.05,*	p>0.05,NS	(sh-CNBP + CCND1 antisense DNA probe) vs (sh-CNBP + CCND1 sense DNA probe)

## Sheet: Figure3J
		sh-ctrl	sh-LAST-1
1	CCND1 sense DNA probe	1	0.558644
	CCND1 antisense DNA probe	5.1337	5.42642
2	CCND1 sense DNA probe	1	1.47427
	CCND1 antisense DNA probe	5.9794	6.10504
3	CCND1 sense DNA probe	1	0.835088
	CCND1 antisense DNA probe	5.20537	5.9794
AVERAGE		1	0.956
		5.43949	5.83695
STDEV		0	0.469635
		0.468945	0.361039
p-value		p<0.01,**	p<0.01,**
		CCND1 antisense DNA probe vs CCND1 sense DNA probe	CCND1 antisense DNA probe vs CCND1 sense DNA probe
