# Supplementary material for: LAST, a c-Myc-inducible long noncoding RNA, cooperates with CNBP to promote CCND1 mRNA stability in human cells
Source: eLife. 2017 Dec 4;6:e30433. doi: 10.7554/eLife.30433 (PMC5739540; doi:10.7554/eLife.30433)
Supplement: Figure 4—source data 1. [file elife-30433-fig4-data1.xlsx]

## Sheet: Figure4A
1	No probe	1
	5'UTR	5.50217
	3'UTR-1	1.19748
	3'UTR-2	1.32907
	3'UTR-3	1.42405
2	No probe	1
	5'UTR	3.97237
	3'UTR-1	1.11729
	3'UTR-2	1.8358
	3'UTR-3	1.04972
3	No probe	1
	5'UTR	4.37717
	3'UTR-1	0.972655
	3'UTR-2	1.42626
	3'UTR-3	1.27456
AVERAGE		1
		4.61724
		1.09581
		1.53038
		1.24944
STDEV		0
		0.792649
		0.113941
		0.268932
		0.188427
p-value		p<0.01,**	5'UTR vs No probe
		p>0.05,NS	3'UTR-1 vs No probe
		p>0.05,NS	3'UTR-2 vs No probe
		p>0.05,NS	3'UTR-3 vs No probe

## Sheet: Figure4F
	ctrl	LAST-WT	LAST-mut-G-rich-A	LAST-mut-G-rich-C	LAST-mut-G-rich-D	LAST-mut-G-rich-F	LAST-mut-G-rich-ACDF
1	1	1448.15	661.685	1618	1052.79	1398.83	803.414
1	1	1016.93	744.434	1370.04	995.999	1112.82	916.506
1	1	1177.52	658.073	1499.23	914.456	1361.8	765.317
AVERAGE	1	1214.2	688.064	1495.76	987.748	1291.15	828.412
STDEV	0	217.941	48.8514	124.02	69.5343	155.545	78.6334
p-value		p<0.01,**	p<0.01,**	p<0.01,**	p<0.01,**	p<0.01,**	p<0.01,**

## Sheet: Figure4G
	ctrl	LAST-WT	LAST-mut-G-rich-A	LAST-mut-G-rich-C	LAST-mut-G-rich-D	LAST-mut-G-rich-F	LAST-mut-G-rich-ACDF
1	1	1.84038	1.6245	1.56917	1.55833	1.39474	1.1487
1	1	1.69349	1.46409	1.6358	1.77769	1.56917	1.11729
1	1	1.51572	1.71713	1.68179	1.61328	1.57074	0.823591
AVERAGE	1	1.68319	1.60191	1.62892	1.64977	1.51155	1.02986
STDEV	0	0.162574	0.128027	0.0566269	0.114138	0.10116	0.179322
p-value		p<0.05,*	p<0.05,*	p<0.01,**	p<0.05,*	p<0.001,***	p>0.05,NS
