# Supplementary material for: LAST, a c-Myc-inducible long noncoding RNA, cooperates with CNBP to promote CCND1 mRNA stability in human cells
Source: eLife. 2017 Dec 4;6:e30433. doi: 10.7554/eLife.30433 (PMC5739540; doi:10.7554/eLife.30433)
Supplement: Figure 5—source data 1. [file elife-30433-fig5-data1.xlsx]

## Sheet: Figure5C
SOX9			1	2	3	4	5	6		Average	STDEV
	sh-ctrl	0 h	1	1	1	1	1	1		1	0
		2 h	0.479632	0.543367	0.514057	0.532185	0.619854	0.45376		0.523809	0.0576731
		4 h	0.34151	0.384219	0.31864	0.323088	0.373712	0.444421		0.364265	0.0473442
		6 h	0.214641	0.204476	0.188156	0.190782	0.236514	0.269807		0.217396	0.0311456
	sh-LAST	0 h	1	1	1	1	1	1		1	0
		2 h	0.273573	0.329877	0.260616	0.293209	0.444421	0.271684		0.31223	0.0692099	p-value<0.01	**
		4 h	0.185565	0.200267	0.180491	0.186856	0.168404	0.225313		0.19115	0.0196511	p-value<0.001	***
		6 h	0.127627	0.163799	0.138696	0.173139	0.168404	0.0418102		0.135579	0.0492953	p-value<0.05	*
NFE2L1			1	2	3	4	5	6	7	Average	STDEV
	sh-ctrl	0 h	1	1	1	1	1	1	1	1	0
		2 h	0.726986	0.817902	0.846745	0.817902	0.673617	0.668964	0.80107	0.764741	0.07371
		4 h	0.668964	0.882703	0.840896	0.939523	0.712025	0.784584	0.920188	0.821269	0.103606
		6 h	0.598739	0.707107	0.737135	0.784584	0.641713	0.602904	0.678302	0.678641	0.0694501
	sh-LAST	0 h	1	1	1	1	1	1	1	1	0
		2 h	0.68302	0.726986	0.641713	0.806642	0.615572	0.61132	0.63728	0.674648	0.0709615	p-value>0.05	NS
		4 h	0.5	0.539614	0.476319	0.466516	0.566442	0.503478	0.438303	0.498667	0.0437263	p-value<0.001	***
		6 h	0.482968	0.41466	0.503478	0.607097	0.411796	0.417544	0.417544	0.465012	0.0728744	p-value<0.001	***
PDF			1	2	3	4	5			Average	STDEV
	sh-ctrl	0 h	1	1	1	1	1			1	0
		2 h	1.09429	0.817902	0.823591	0.870551	1.23114			0.967496	0.185791
		4 h	0.97942	0.721965	0.752623	0.895025	1.01396			0.872599	0.131322
		6 h	0.61132	0.590496	0.521233	0.773782	0.80107			0.65958	0.121761
	sh-LAST	0 h	1	1	1	1	1			1	0
		2 h	0.768438	0.806642	0.742262	0.80107	0.779165			0.779515	0.0260341	p-value>0.05	NS
		4 h	0.479632	0.554785	0.482968	0.554785	0.469761			0.508386	0.0426333	p-value<0.01	**
		6 h	0.473029	0.450625	0.366021	0.466516	0.329877			0.417214	0.0650207	p-value<0.01	**

## Sheet: Figure5D
SOX9			1	2	3		Average	STDEV
	ctrl	0 h	1	1	1		1	0
		2 h	0.366021	0.184284	0.295248		0.281851	0.0916066
		4 h	0.171943	0.160428	0.183011		0.171794	0.011292
		6 h	0.0883883	0.060371	0.0698304		0.0728633	0.0142528
	LAST	0 h	1	1	1		1	0
		2 h	0.840896	0.668964	0.726986		0.745615	0.0874671	p-value<0.05	*
		4 h	0.208772	0.234881	0.262429		0.235361	0.0268318	p-value<0.05	*
		6 h	0.128514	0.164938	0.147624		0.147026	0.0182195	p-value<0.05	*
NFE2L1			1	2	3		Average	STDEV
	ctrl	0 h	1	1	1		1	0
		2 h	0.742262	0.68302	0.558644		0.661308	0.0937148
		4 h	0.619854	0.570382	0.535887		0.575374	0.0422056
		6 h	0.426317	0.312083	0.29937		0.345923	0.069913
	LAST	0 h	1	1	1		1	0
		2 h	1.21419	1.34723	1.68179		1.41441	0.240928	p-value<0.05	*
		4 h	0.716978	0.784584	0.946058		0.815873	0.117702	p-value>0.05	NS
		6 h	0.493116	0.550953	0.63728		0.56045	0.0725497	p-value<0.05	*
PDF			1	2	3		Average	STDEV
	ctrl	0 h	1	1	1		1	0
		2 h	0.586417	0.360982	0.659754		0.535718	0.155705
		4 h	0.423373	0.420448	0.496546		0.446789	0.0431158
		6 h	0.20166	0.186856	0.213159		0.200558	0.0131859
	LAST	0 h	1	1	1		1	0
		2 h	1.02101	1.18099	1.14076		1.11426	0.0832192	p-value<0.05	*
		4 h	0.496546	0.554785	0.510506		0.520612	0.0304061	p-value>0.05	NS
		6 h	0.289172	0.381565	0.351111		0.340616	0.047082	p-value<0.05	*

## Sheet: Figure5F
		sh-ctrl	sh-CNBP
1	NFE2L	1	0.692555
	SOX9	1	0.479632
	PDF	1	0.578344
2	NFE2L	1	0.655197
	SOX9	1	0.447513
	PDF	1	0.532185
3	NFE2L	1	0.641713
	SOX9	1	0.435275
	PDF	1	0.524858
Average		1	0.663155
		1	0.45414
		1	0.545129
STDEV		0	0.0263386
		0	0.022909
		0	0.0289973
p-value			p<0.001,***
			p<0.001,***
			p<0.001,***
