# Supplementary material for: LAST, a c-Myc-inducible long noncoding RNA, cooperates with CNBP to promote CCND1 mRNA stability in human cells
Source: eLife. 2017 Dec 4;6:e30433. doi: 10.7554/eLife.30433 (PMC5739540; doi:10.7554/eLife.30433)
Supplement: Figure 6—source data 1. [file elife-30433-fig6-data1.xlsx]

## Sheet: Figure 6B
	1	2	3	4	5	6	7		AVERAGE		STDEV		p-value
sh-ctrl	0.2771	0.182	0.1629	0.1866	0.3042	0.2536	0.3712		0.248229		0.0759193
sh-LAST-1	0	0.0028	0	0	0	0	0		0.0004		0.0010583		p<0.001,***	sh-LAST-1 vs sh-ctrl

## Sheet: Figure 6D
	1	2	3	4	5	6	7		AVERAGE		STDEV		p-value
ctrl	0.0092	0.0292	0.0027	0.0157	0.0137	0	0		0.0100714		0.0105571
LAST	0.2715	0.1586	0.1923	0.3906	0.375	0.3712	0.3042		0.294771		0.092317		p<0.001,***	LAST-1 vs ctrl

## Sheet: Figure 6E
p-value<0.001, ***			p-value<0.001, ***
COAD-N-LAST	COAD-T-LAST		COAD-N-CCND1	COAD-T-CCND1
0.95176	0.96363		16.036	56.3013
3.44358	12.5642		16.7137	33.0461
3.27637	1.47723		9.49206	34.8358
4.13661	1.94356		15.2125	50.6296
1.08389	3.32822		8.85379	46.7138
3.45073	4.70052		16.7625	39.829
1.919	1.37062		17.1062	52.8162
3.9468	4.05519		10.5199	78.5608
2.13603	2.39118		16.8936	92.1848
1.85239	4.38261		12.3876	54.6544
2.1513	11.2502		14.5885	55.9872
1.60658	13.7187		10.8028	42.0668
2.02098	15.7874		14.6286	47.328
4.60964	11.4225		13.1218	30.9188
1.90597	4.55851		14.6442	61.7145
2.20994	6.94404		10.0461	36.1397
3.39965	17.0986		19.6192	21.7593
2.42782	7.93077		14.1945	23.1373
0.50107	1.42128		12.2852	113.255
3.90497	4.63558		11.3667	51.0953
2.57283	10.0671		13.1713	25.5203
3.15831	20.0644		15.1532	62.8247
3.30973	4.7723		11.8166	53.6476
5.96833	0.92877		14.3462	77.0057
1.62123	3.31003		14.4997	33.7701
2.24715	3.73919		8.66482	57.9372
5.32734	5.70254		17.2638	17.9414
5.9399	4.89043		14.2072	47.8338
4.61856	1.0894		12.4415	87.3024
6.25035	2.48801		18.9966	69.6032
2.48808	7.94929		17.3474	60.504
2.07959	4.89331		10.0521	54.8763
3.40174	4.13249		15.4914	86.4727
2.63998	0.5525		7.10369	58.8228
3.56511	10.4133		15.4172	56.7848
3.09985	6.13289		15.0462	60.0279
0.18493	6.93965		27.5926	74.9494
2.06299	7.28826		24.7382	32.2174
2.76604	3.47346		24.4654	69.2623
1.90157	12.2523		13.577	52.012
4.12255	0.56959		18.4331	50.4052
	5.98712			96.9288
	2.20282			82.3046
	4.0811			65.1151
	1.04181			42.9873
	1.38302			48.2377
	5.69613			108.898
	3.32602			44.446
	2.14324			97.4705
	4.27073			51.098
	3.38067			119.194
	8.47076			39.4011
	1.64023			30.1538
	0.77405			40.1778
	4.75112			87.9048
	1.19558			92.6732
	2.60247			56.791
	18.9157			30.7056
	3.32517			33.3204
	6.81066			27.2026
	3.88648			62.2773
	23.4607			24.0007
	5.41286			34.6574
	10.5144			47.3803
	5.51239			38.525
	3.59913			55.7736
	10.6921			21.5562
	6.47186			40.7928
	11.473			41.0272
	2.81011			100.766
	5.93931			38.2101
	9.72332			43.916
	7.59387			38.7826
	6.60903			45.6599
	4.15409			63.8646
	5.07515			34.4141
	5.95417			34.8128
	15.5215			47.2298
	11.2822			37.9167
	6.08751			31.4986
	2.79376			157.511
	3.40984			40.5491
	17.6835			40.757
	11.3562			66.7477
	2.87142			72.5845
	10.3378			70.1032
	38.6162			25.7644
	7.39903			35.7879
	20.1488			23.9941
	8.61003			21.5106
	9.04726			34.4278
	8.15195			35.2941
	8.77513			85.0163
	8.60104			49.9222
	7.20587			203.849
	4.85183			68.4497
	15.2903			13.1729
	12.5368			16.2027
	12.1633			22.6431
	11.4668			38.7499
	5.12208			32.7602
	3.82562			38.8545
	16.9942			68.7832
	2.23204			36.5119
	9.1031			25.9294
	11.1767			41.3378
	12.9509			47.4325
	2.96505			42.1907
	3.72271			38.9332
	4.38974			51.1297
	5.44682			28.9945
	4.83111			67.0079
	4.13222			27.0582
	12.2035			34.4173
	3.88177			43.0526
	2.77396			30.1446
	2.60432			28.9881
	14.779			34.588
	0.76836			120.02
	4.2373			54.2552
	3.64468			50.461
	2.77393			44.3545
	7.04623			61.0191
	7.05004			67.1448
	15.2698			47.4719
	2.1518			35.0619
	3.61005			29.4337
	10.9819			37.4742
	5.77555			44.104
	5.59071			45.8543
	8.03707			45.3826
	5.92357			41.12
	7.49679			59.9019
	9.20475			68.9793
	7.93961			35.9522
	12.5422			37.5412
	7.23175			26.6252
	3.0341			175.968
	4.37593			65.8188
	10.341			31.6295
	4.6383			34.1871
	4.80696			22.3523
	10.9115			27.6293
	14.0935			63.7837
	2.10791			61.7528
	6.83439			49.0496
	4.22074			47.5281
	3.83399			55.8422
	4.55473			44.9235
	5.97668			29.624
	7.13361			53.3978
	4.01261			50.2684
	6.03692			108.55
	3.26507			31.7355
	1.69454			42.8852
	5.18364			83.1655
	2.41799			57.7929
	6.97084			31.0681
	4.05072			49.2348
	5.56688			24.4919
	6.94036			30.4036
	7.59395			15.2967
	3.53951			44.2475
	6.19806			41.2536
	4.34287			13.2116
	17.2136			38.0454
	8.02066			34.1302
	11.1226			32.7699
	12.2395			50.9535
	12.4059			44.2391
	15.1253			29.5805
	8.63113			48.9621
	6.51976			80.49
	14.9154			38.0303
	8.20217			49.5948
	3.69391			47.3049
	5.10825			32.615
	11.039			38.3167
	19.7867			45.1176
	1.10514			56.1127
	8.46651			45.9735
	8.57018			63.1015
	2.43563			47.94
	11.9787			53.4506
	12.4737			68.1698
	8.31925			49.4021
	10.3843			40.4876
	7.99493			89.6478
	8.83686			70.5532
	5.44725			47.1907
	14.1037			41.9409
	3.59681			60.4437
	11.5477			162.102
	5.01237			54.6507
	3.75766			49.9662
	3.83768			58.0664
	10.436			69.0242
	6.48725			70.63
	1.4507			47.7922
	9.23444			38.1608
	6.79636			42.9763
	6.15568			39.379
	3.62628			30.7623
	6.14628			64.482
	2.31624			34.1387
	5.5315			50.7458
	1.89652			66.9114
	22.1624			65.9264
	5.60549			58.3275
	16.9077			48.5189
	13.7085			22.5204
	4.696			45.8059
	4.40843			92.8821
	15.2905			36.1404
	11.3657			66.6038
	6.88368			50.7215
	4.69848			59.4012
	7.68558			38.9428
	1.44564			26.8559
	5.53779			52.2675
	5.14196			46.5056
	3.82977			30.1088
	4.23341			32.5872
	4.09964			104.315
	7.51545			88.9902
	5.36581			42.6671
	8.8042			23.5675
	5.26587			48.0404
	5.25926			69.5502
	7.64489			57.1071
	5.06167			64.537
	7.73845			69.8519
	3.13653			49.0693
	3.29721			70.6252
	6.24212			33.8305
	3.39501			81.9463
	15.0978			51.4822
	7.32478			54.5522
	2.80427			31.7653
	7.72364			59.7974
	3.94008			49.8011
	5.28679			75.0585
	2.18778			125.157
	7.8921			34.0406
	4.74382			60.8003
	10.0965			104.798
	5.26713			20.8477
	3.93314			25.8504
	2.76052			48.5923
	9.62115			56.2923
	2.57925			35.7117
	8.69561			29.8793
	1.7171			44.7731
	1.27406			36.0967
	8.41646			44.1608
	29.6564			23.5121
	19.8887			27.3199
	21.1577			22.3293
	4.60319			19.8309
	11.0912			80.3253
	2.56598			49.6527
	12.1391			64.2447
	5.30818			27.0749
	20.0816			29.6953
	10.0423			44.4466
	4.21147			30.0469
	18.4836			65.6012
	2.35647			33.5175
	0.40096			41.4865
	3.94566			106.354
	10.4337			66.1602
	5.30333			72.5867
	2.98171			24.9548
	3.18115			75.1666
	16.1782			52.7864
	2.8855			74.3741
	5.07554			43.8041
	17.3716			24.3605
	4.2433			16.1558
	1.33366			85.7393
	7.54979			45.1226
	2.53016			62.861
	10.1617			52.3282
	6.70835			104.213
	1.09131			79.1677
	5.70003			48.3132
	7.33482			49.3346
	0.64758			37.6662
	7.26723			47.8043
	3.52169			51.0185
	7.01869			40.5137
	5.24438			55.6414
	7.58425			55.1917
	3.84082			124.452
	3.70737			63.7937
	10.1153			143.089
	5.31893			49.1291
	4.61516			82.052
	5.70207			33.7878
	8.98377			51.2323
	3.6889			41.6173
	6.56212			30.1951
	3.81059			19.7874
	5.03641			44.1035
	11.9401			38.8843
	4.40269			39.687
	8.3978			22.2889
	15.2848			17.9762
	5.43098			52.7397
	1.42122			35.3366
	0.71138			24.8009
	2.79926			36.537
	10.8859			43.0496
	10.3854			24.7217
	3.04376			48.5332
	1.69001			27.3997
	11.754			28.3809
	0.94111			91.3577
	0.82809			57.8342
	9.67025			35.0986
	19.9004			94.2847
	4.13678			73.9029
	7.268			121.94
	0.92905			24.8987
	3.91448			42.5187
	1.71789			67.1307
	6.48141			72.6472
	3.63217			236.331
	1.90917			18.9734
	3.15203			55.6491
	1.76013			25.331
	10.0293			58.5193
	8.91407			34.1139
	5.70663			41.789
	7.7518			59.3338
	2.46222			29.9558
	3.10088			46.8809
	2.6152			33.5679
	3.20601			44.0628
	4.26315			39.4004
	12.5123			52.8688
	1.7983			51.2519
	6.51263			57.4698
	3.89444			54.6673
	13.7052			54.8477
	9.36202			52.0163
	3.60717			120
	2.90467			48.3034
	1.86772			43.9176
	4.81984			55.5908
	2.3813			74.3673
	1.89598			29.0189
	4.40084			89.6853
	4.27772			63.4495
	7.19868			80.4303
	2.86948			32.5688
	5.89539			68.7582
	5.11852			87.6863
	4.6803			52.8822
	8.7738			44.7884
	8.33936			67.8314
	3.5125			71.932
	9.54805			43.3415
	5.65795			78.6984
	2.02163			78.4661
	15.8967			56.0302
	1.66882			49.8206
	1.58729			37.003
	1.86			41.2822
	1.65088			80.6472
	4.39267			33.6338
	10.1051			25.597
	1.49948			28.6636
	14.1974			24.5202
	19.548			48.1158
	7.76421			46.4613
	13.6791			20.5084
	5.85052			45.8415
	3.54222			121.905
	5.19851			28.757
	2.23403			40.838
	4.26391			61.2196
	13.0294			81.3165
	4.46042			16.4463
	3.66969			76.049
	2.21639			60.3815
	7.78148			51.9758
	3.17572			64.9541
	3.86239			58.2032
	6.69674			31.6187
	6.36517			55.6031
	2.09758			23.2102
	3.23958			56.2841
	5.95783			51.1858
	3.59921			68.5763
	0.31297			115.393
	2.26557			67.7738
	7.67468			82.1132
	2.2335			33.8096
	9.7442			34.3241
	5.18069			48.5426
	1.42682			48.1636
	8.3635			57.3954
	6.77139			72.3835
	3.02995			39.8849
	7.73048			74.7735
	2.64581			54.1112
	2.69233			72.4197
	2.81697			68.3866
	12.3806			35.2752
	8.94958			110.942
	5.0464			66.2369
	0.47454			161.996
	8.45955			50.0075
	2.7019			42.9592
	10.3856			62.4348
	18.5159			79.7609
	11.7104			59.6819
	18.0095			68.5553
	2.75502			42.0361
	10.6146			38.1957
	4.89324			77.1466
	7.55543			98.0504
	6.84426			70.5449
	15.2139			24.5362
	11.3114			65.5083
	2.78952			14.7751
	6.09842			72.8347
	3.27854			53.4972
	8.35471			42.9954
	1.14754			53.6576
	6.99387			67.4716
	3.46933			78.5395
	4.17757			47.1904
	7.56028			56.4724
	3.56402			40.9968
	2.10112			47.8835
	2.87657			29.6222
	2.37723			61.1898
	1.30913			108.453
	1.35036			55.519
	2.28092			37.8179
	1.1042			56.0239
	1.56402			50.0965
	5.77507			63.597
	3.97015			29.1913
	1.54101			16.9344
	3.62544			79.4599
	3.2177			45.4
	2.43235			38.3725
	13.4889			7.64169
	7.57712			92.3267
	5.09373			59.661
	1.21147			47.7164

## Sheet: Figure 6F
p-value<0.001, ***			p-value<0.001, ***
READ-N-LAST	READ-T-LAST		READ-N-CCND1	READ-T-CCND1
2.89653	3.10306		15.216	77.0361
3.44082	7.7699		26.0145	34.3115
3.30062	13.3709		21.9992	33.211
5.42383	3.99297		20.9142	37.7139
1.81674	4.32383		18.2718	45.1384
8.3196	11.6569		6.63403	26.4873
4.74506	12.8503		21.0824	43.1147
3.36808	5.0656		19.8479	42.9953
3.80322	11.3291		14.4472	50.3786
2.28088	1.21935		12.6289	84.7796
	3.97046			24.9548
	8.57291			44.3223
	4.76514			27.9565
	4.11441			64.4122
	5.35869			49.3063
	8.64052			76.864
	10.7868			43.1532
	7.04139			48.2633
	4.30566			36.7076
	1.74606			78.2999
	7.20371			30.1099
	9.07861			30.45
	2.6004			25.8799
	10.9801			41.0438
	11.439			50.5452
	5.97966			43.3439
	5.38722			13.1623
	10.64			43.5755
	6.67697			38.5512
	2.77376			31.1106
	33.5051			44.355
	9.32404			50.6821
	2.52588			16.9902
	14.0506			20.998
	12.9282			26.8223
	23.0866			13.1807
	16.1863			21.11
	4.29891			27.163
	7.81612			6.86069
	30.5716			37.0479
	4.79883			26.4628
	8.8947			97.7965
	4.88403			55.6388
	16.8244			38.7507
	7.5451			65.8714
	6.75425			40.5898
	10.7335			59.3605
	5.53368			51.7475
	15.8543			16.6381
	15.0148			33.5001
	6.69753			36.3597
	6.74988			25.3219
	14.1047			34.8291
	7.03689			34.4896
	10.3761			42.6943
	8.8623			30.3874
	1.54498			64.6842
	9.16456			41.0658
	7.96251			49.2718
	2.39934			39.6487
	4.59997			31.1624
	5.65248			62.1042
	6.24924			75.19
	2.42344			70.2185
	9.26628			44.775
	4.42876			43.1989
	9.36406			56.1153
	9.47515			43.6565
	7.06627			18.557
	7.8494			64.2958
	4.79072			154.655
	5.5291			42.1381
	9.18631			36.7805
	12.038			52.7392
	7.83784			62.0906
	37.0583			33.6163
	14.6362			72.5795
	2.73554			43.4844
	4.02578			51.2933
	6.39229			38.99
	4.0497			41.3504
	16.9638			43.5926
	18.1828			54.186
	4.46778			135.669
	4.49442			57.7348
	7.7871			42.9542
	10.2514			57.4296
	5.56699			71.551
	7.13805			73.0486
	7.2311			42.0143
	12.6936			65.9179
	15.5363			39.7727
	9.85541			44.4317
	7.68482			38.7512
	3.92293			35.0546
	4.31666			58.8411
	0.85978			62.6473
	1.53087			42.5276
	12.0183			49.9978
	8.10272			43.3863
	2.49902			28.0082
	5.0123			63.1919
	9.52682			55.1024
	3.31227			74.7699
	3.23191			55.3582
	16.2504			47.4814
	9.08459			46.7185
	5.34697			44.5284
	4.28723			86.9314
	4.63944			48.6782
	5.04414			25.1134
	6.53891			38.7799
	2.49424			19.9565
	9.92406			51.1802
	7.82774			53.2135
	12.6988			24.1727
	2.86389			86.964
	10.1864			69.4034
	3.88051			46.3417
	0.57259			62.4162
	4.14088			52.0684
	7.14337			46.9239
	8.41281			67.5366
	1.98799			193.595
	6.80648			40.176
	7.891			51.2942
	10.3061			46.3218
	10.4252			23.0168
	13.4562			18.1831
	15.2343			35.5494
	11.1558			40.6376
	9.29629			43.6232
	1.75871			84.3516
	4.71267			69.134
	2.84539			207.404
	3.2223			40.8635
	3.23208			41.487
	5.89199			31.5546
	6.06708			45.1735
	1.66072			37.7238
	3.80562			49.9254
	4.78682			77.0154
	4.01667			47.1485
	4.8131			82.8669
	5.30039			42.8579
	10.9373			23.2805
	2.81289			61.2846
	5.90167			83.0125
	5.2652			55.2603
	2.14084			63.9952
	6.04204			66.3277
	2.63705			45.1873
	7.86317			85.3147
	4.15115			73.5194
	3.2699			75.2892
	8.36915			72.8978
	11.4947			49.8324
	6.59739			66.9759
	4.87861			65.6977
	3.63125			117.057
	3.20719			53.3992
	11.2475			22.1924
	13.7146			39.6378
	2.41942			86.6574
	5.73272			34.1507
