# Supplementary material for: LAST, a c-Myc-inducible long noncoding RNA, cooperates with CNBP to promote CCND1 mRNA stability in human cells
Source: eLife journal article supplement (doi:10.7554/elife.30433), 2017-12-04

# Figure 3-figure supplement 2

Fig. 3D

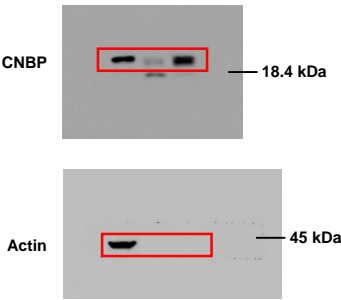

Fig. 3E

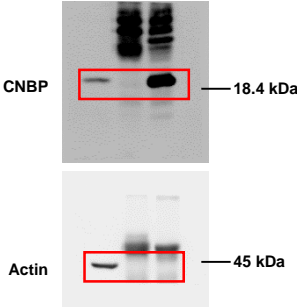

Fig. 3F

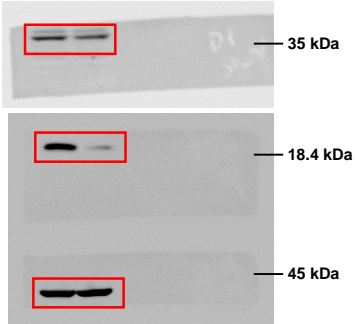

Fig. 3H

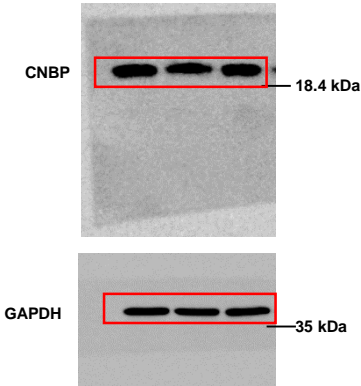

Fig. 3I

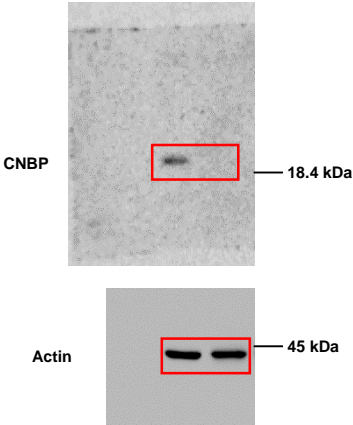

Fig. 3J

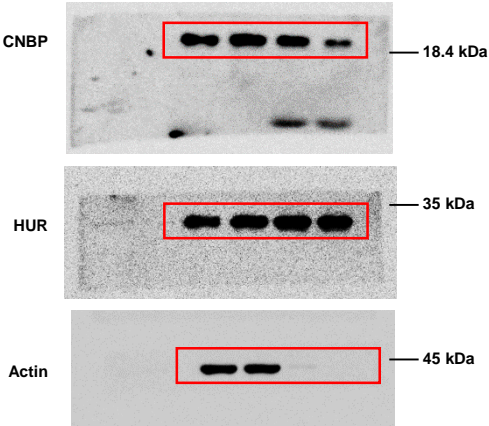

Fig. 3-figure supp. 1C

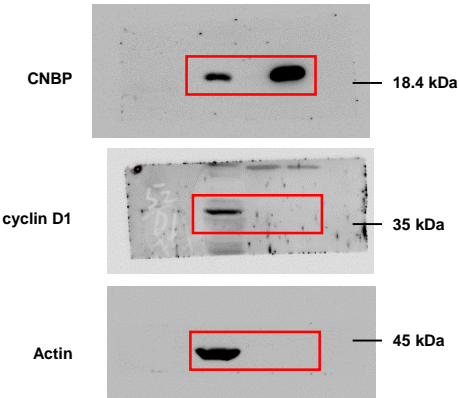

Fig. 3-figure supp. 1D

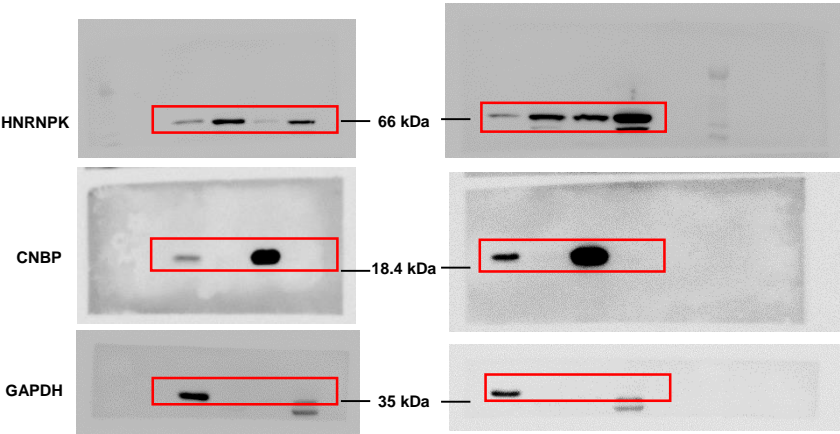

Fig. 3-figure supp. 1F

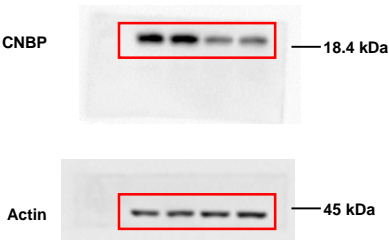

Supplement: supp [file elife_poa_e30433_Figure_3_figure_supplement_2.pdf › elife_poa_e30433_Figure_3_figure_supplement_2.pdf]
