# Supplementary figures and images for: LAST, a c-Myc-inducible long noncoding RNA, cooperates with CNBP to promote CCND1 mRNA stability in human cells
Source: eLife journal article supplement (doi:10.7554/elife.30433), 2017-12-04

Figure 1-figure supplement 1

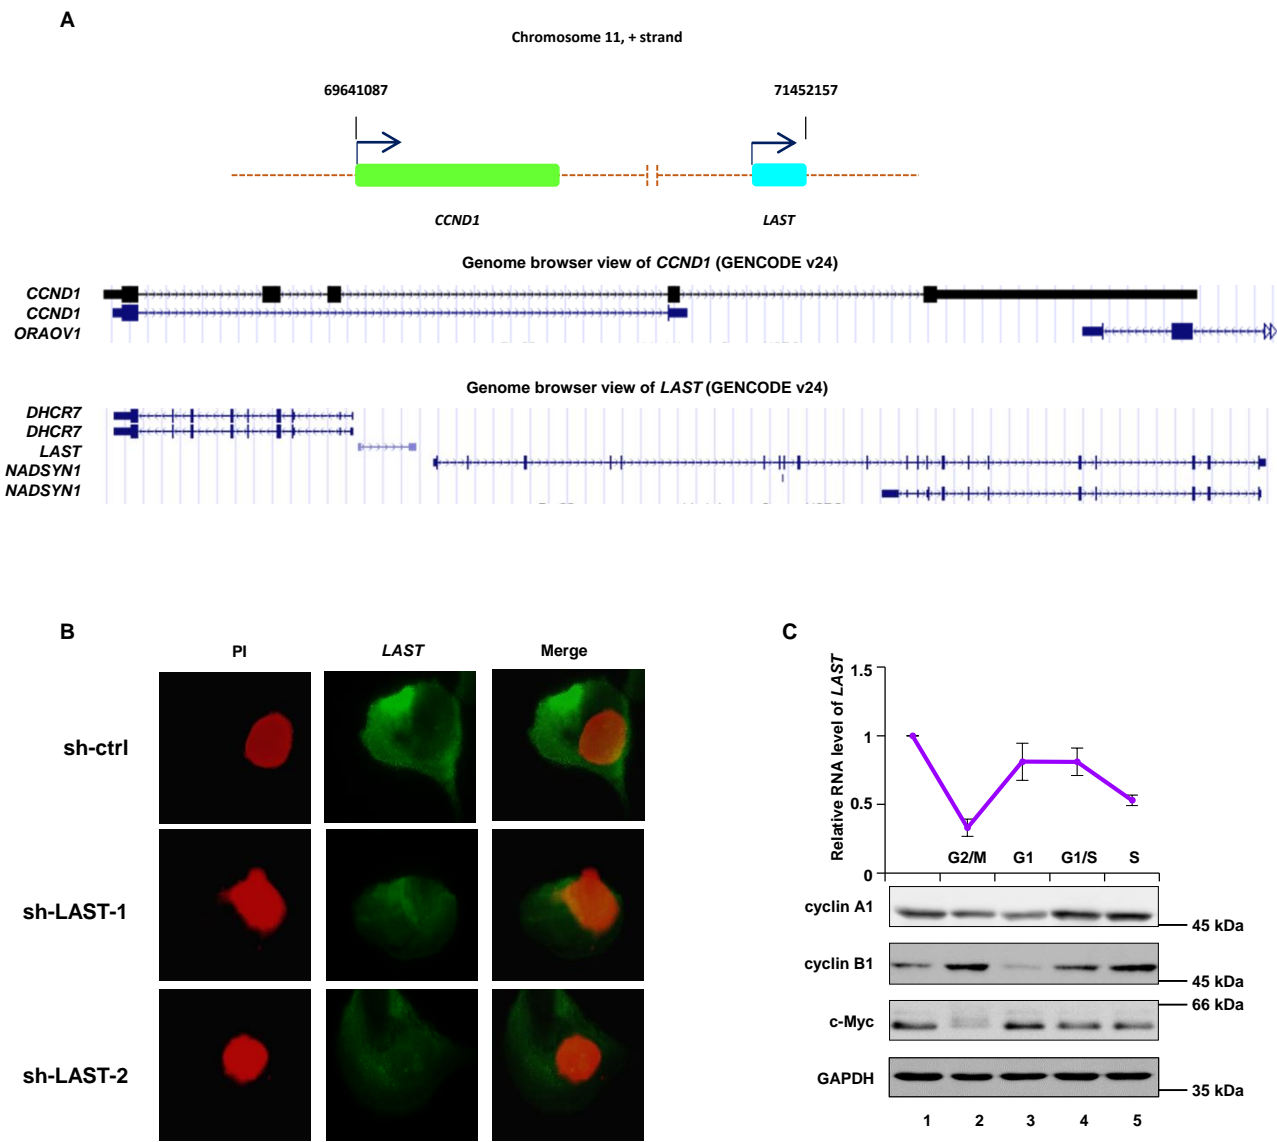

Supplement: supp [file elife_poa_e30433_Figure_1_figure_supplement_1.pdf › elife_poa_e30433_Figure_1_figure_supplement_1.pdf]

# Figure 1-figure supplement 2

Fig. 1A

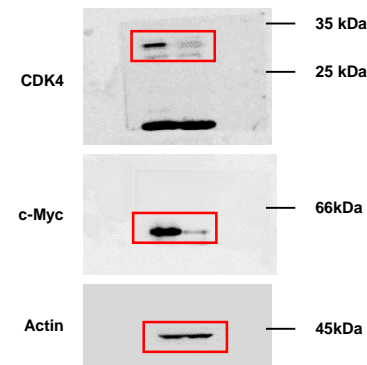

Fig. 1E

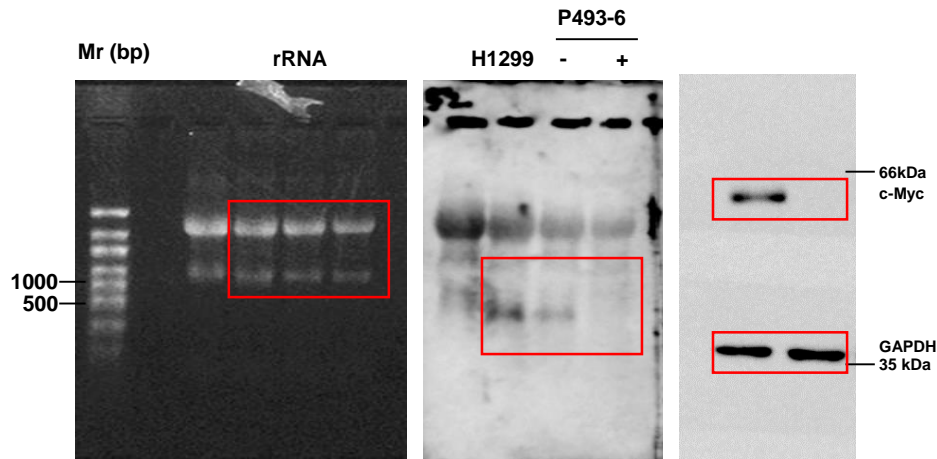

Fig. 1I

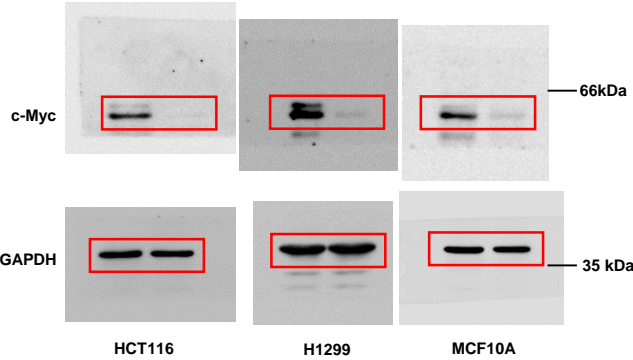

Fig. 1J

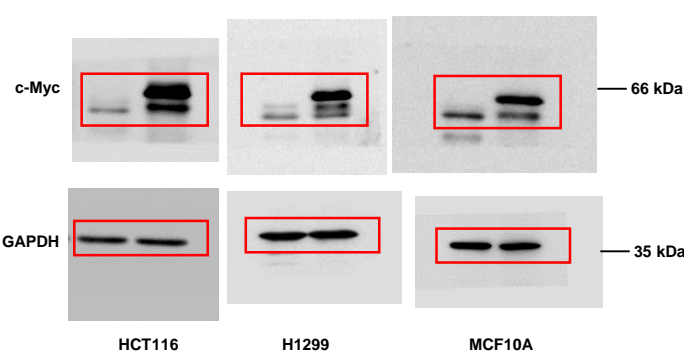

Fig. 1-figure supp. 1C

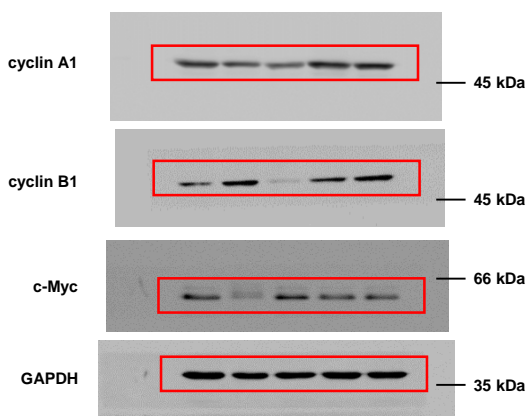

Supplement: supp [file elife_poa_e30433_Figure_1_figure_supplement_2.pdf › elife_poa_e30433_Figure_1_figure_supplement_2.pdf]

## Figure 2-figure supplement 1

**A**

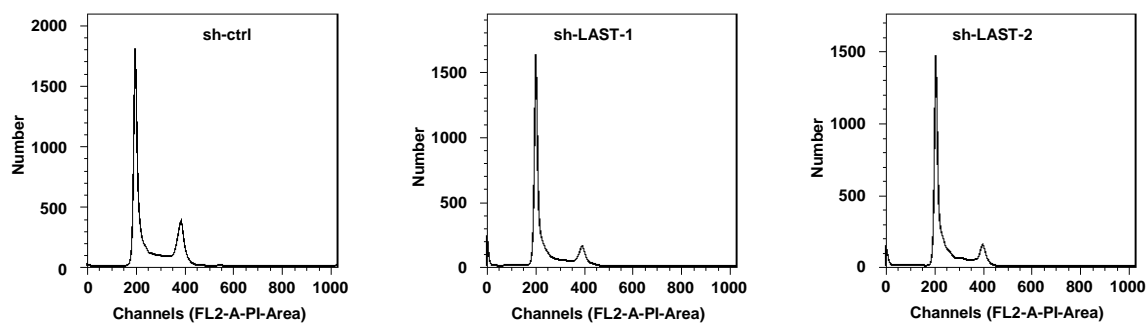

**B**

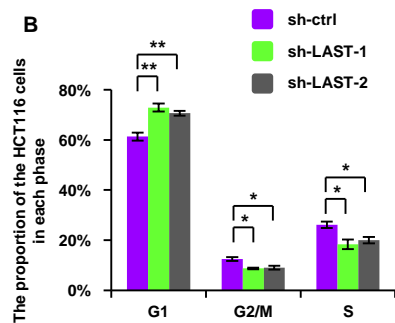

**C**

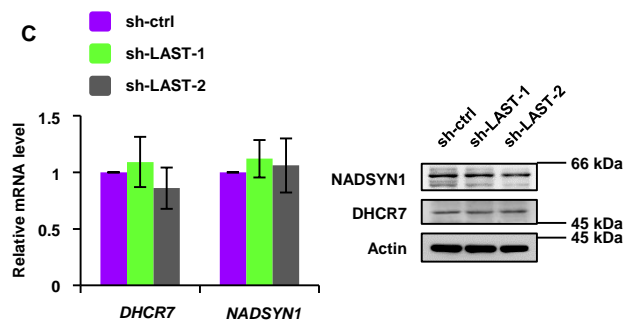

D

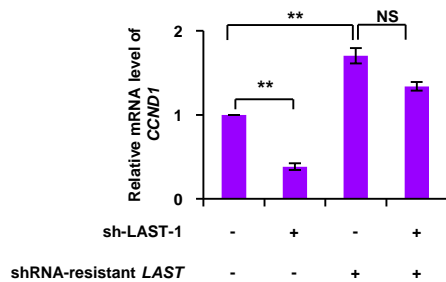

**E**

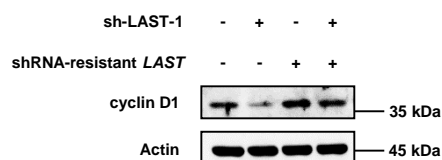

Supplement: supp [file elife_poa_e30433_Figure_2_figure_supplement_1.pdf › elife_poa_e30433_Figure_2_figure_supplement_1.pdf]

# Figure 2-figure supplement 2

Fig. 2B

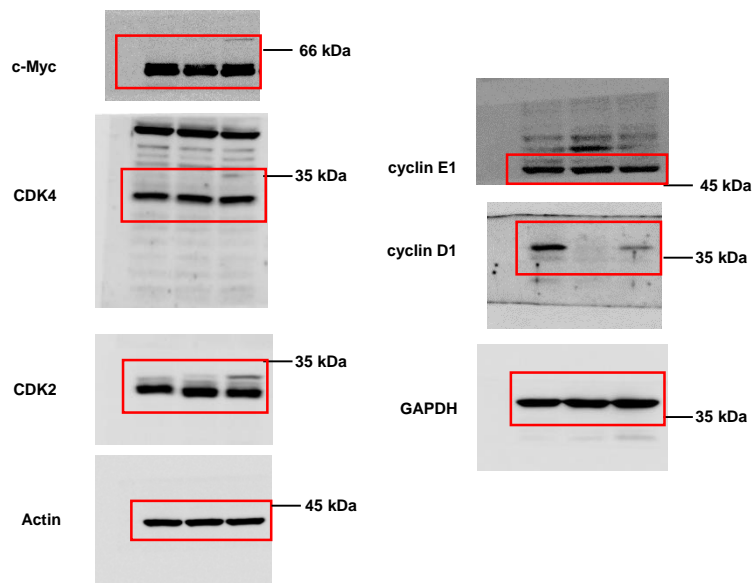

Fig. 2C

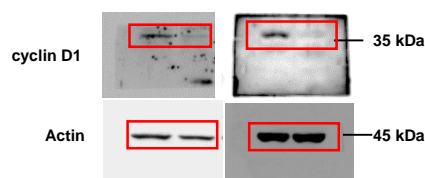

Fig. 2D

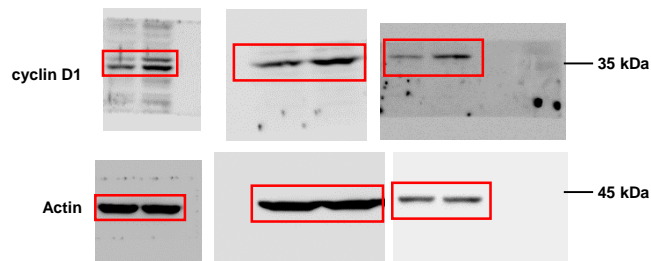

Fig. 2-figure supp. 1C

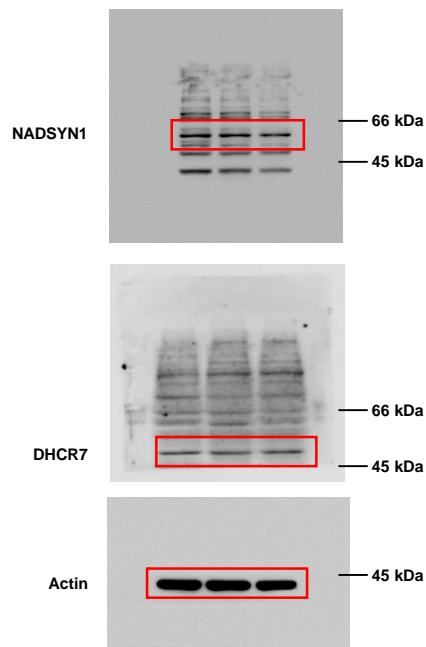

Fig. 2-figure supp. 1E

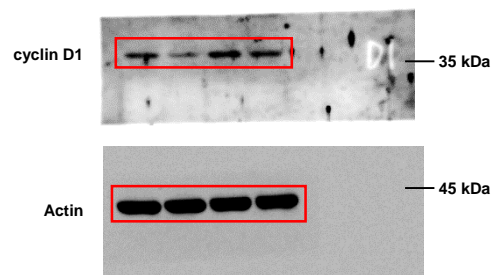

Supplement: supp [file elife_poa_e30433_Figure_2_figure_supplement_2.pdf › elife_poa_e30433_Figure_2_figure_supplement_2.pdf]

Figure 3-figure supplement 1

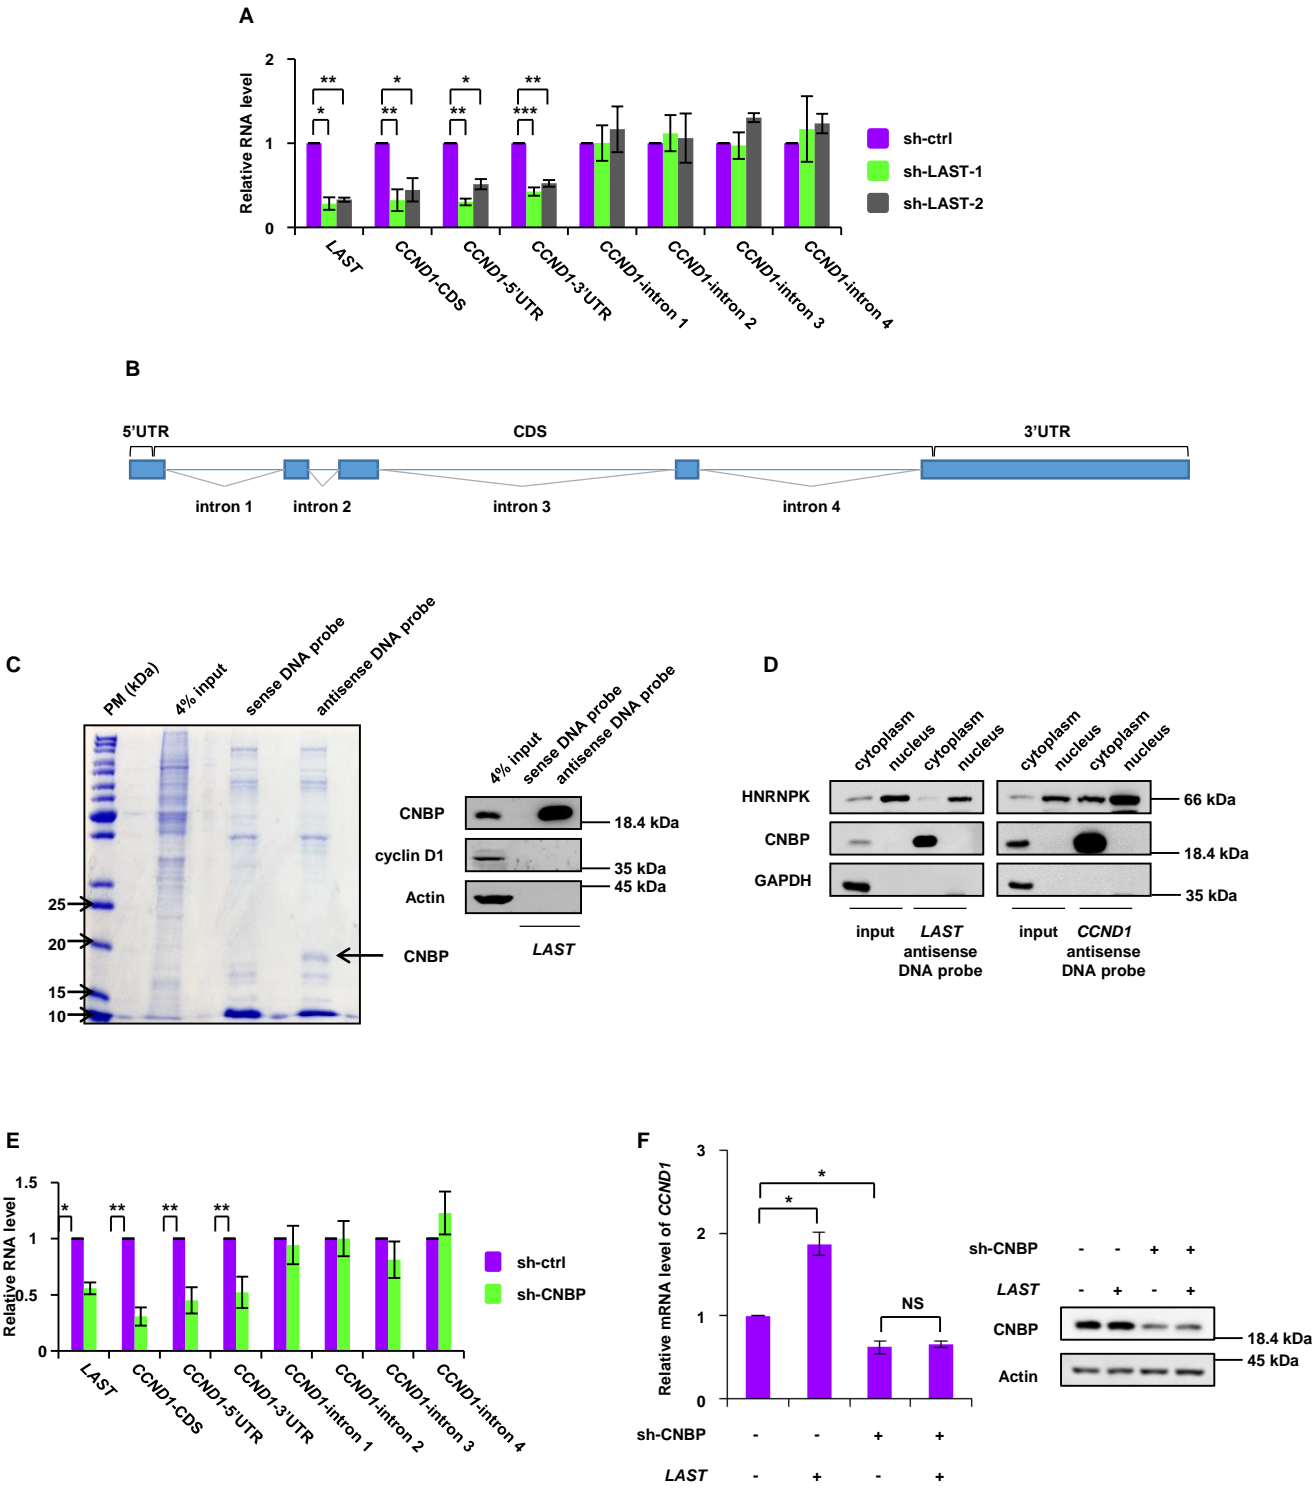

Supplement: supp [file elife_poa_e30433_Figure_3_figure_supplement_1.pdf › elife_poa_e30433_Figure_3_figure_supplement_1.pdf]

Figure 4-figure supplement 1

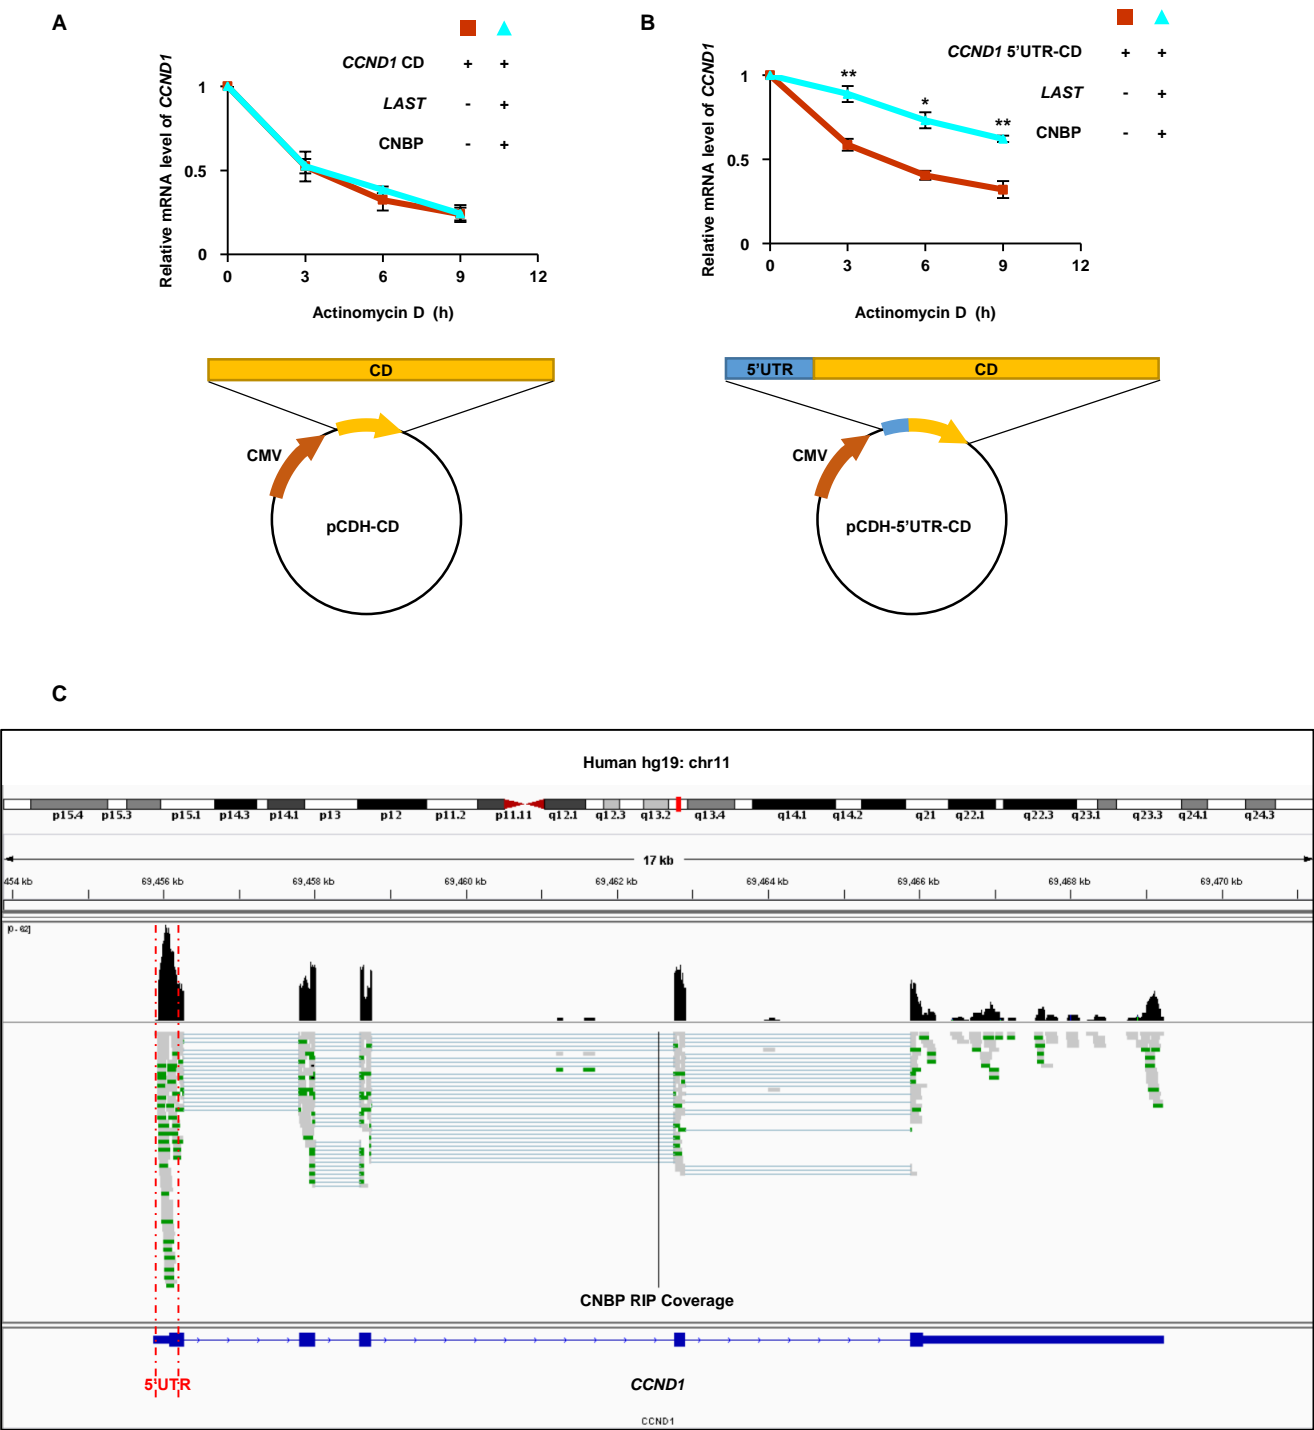

Supplement: supp [file elife_poa_e30433_Figure_4_figure_supplement_1.pdf › elife_poa_e30433_Figure_4_figure_supplement_1.pdf]

Figure 4-figure supplement 2

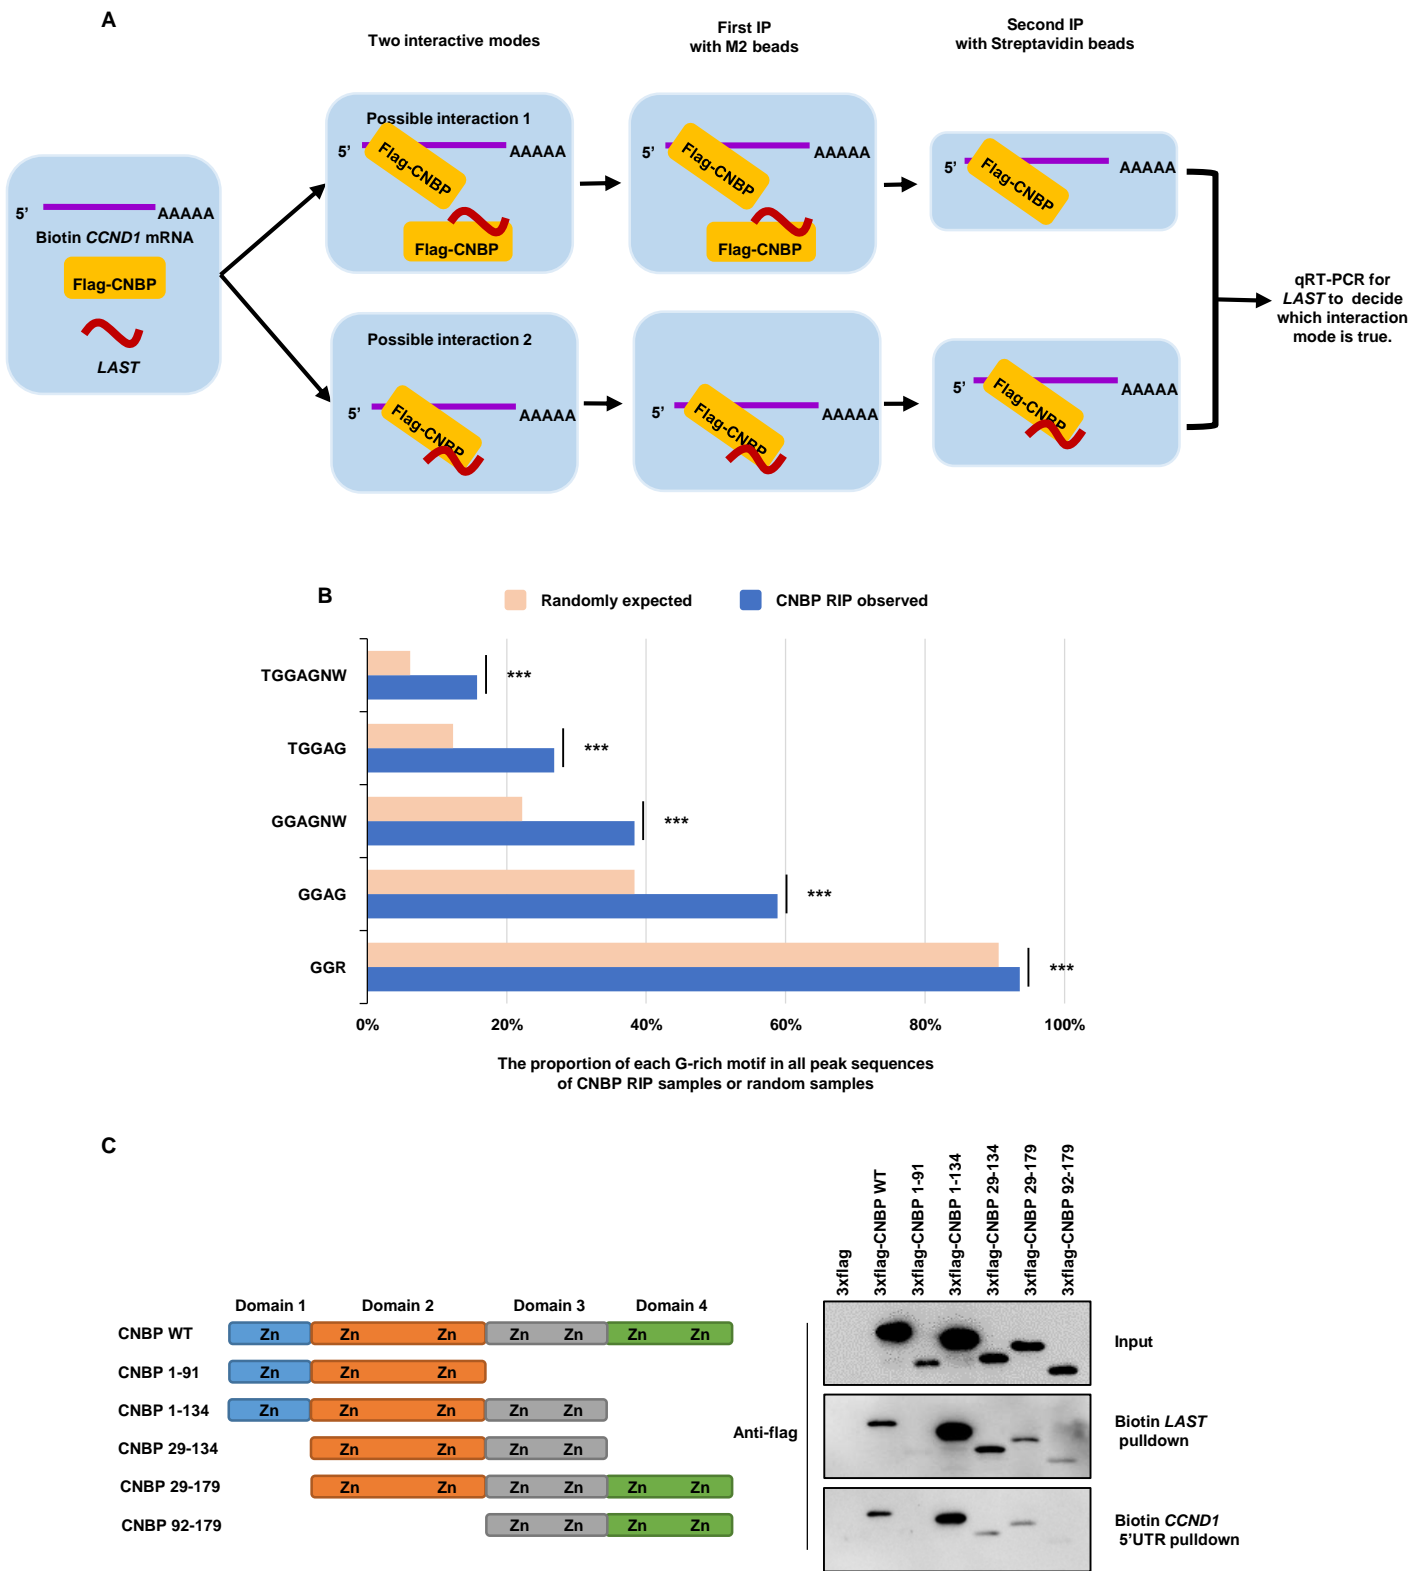

Supplement: supp [file elife_poa_e30433_Figure_4_figure_supplement_2.pdf › elife_poa_e30433_Figure_4_figure_supplement_2.pdf]

Figure 4-figure supplement 3

Fig. 4B

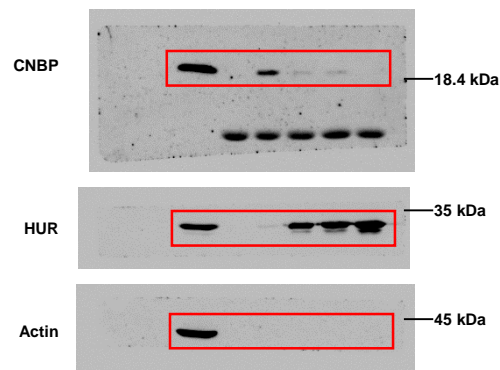

Fig. 4C

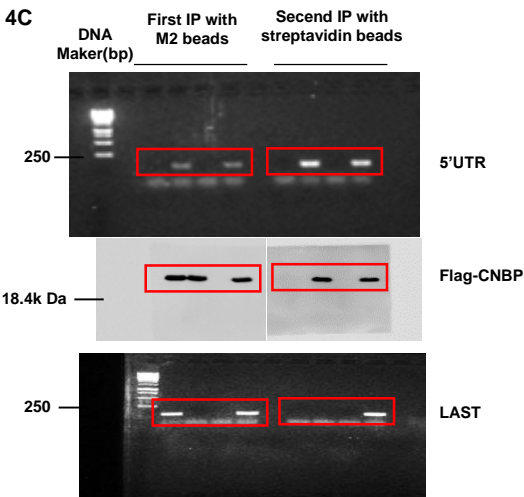

Fig. 4D

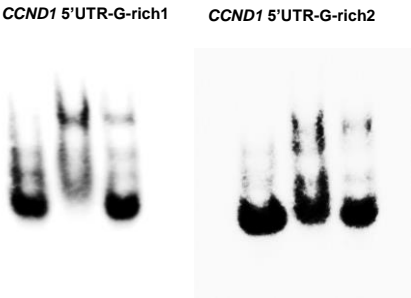

Fig. 4E

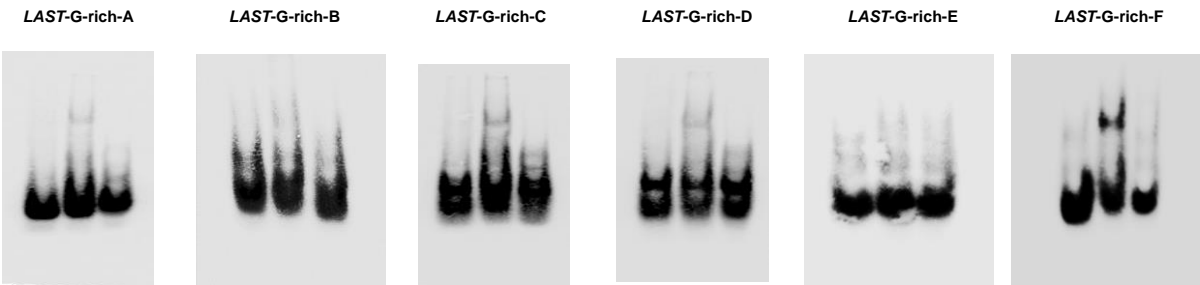

Fig. 4-figure supp. 2C

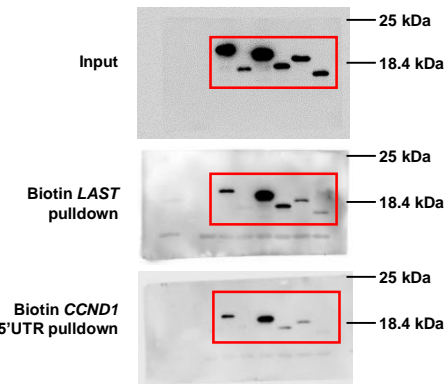

Supplement: supp [file elife_poa_e30433_Figure_4_figure_supplement_3.pdf › elife_poa_e30433_Figure_4_figure_supplement_3.pdf]

Figure 5-figure supplement 1

Fig. 5E

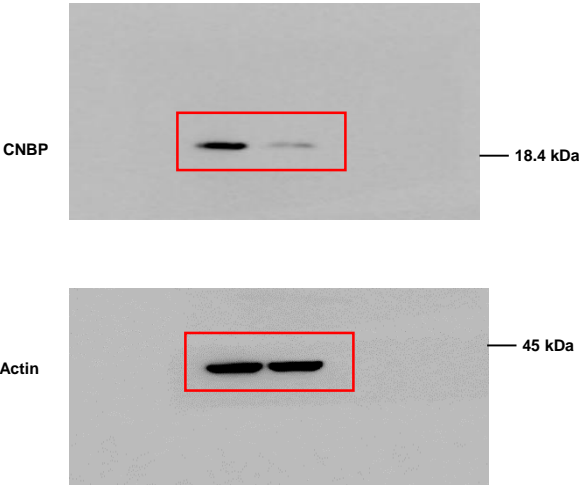

Supplement: supp [file elife_poa_e30433_Figure_5_figure_supplement_1.pdf › elife_poa_e30433_Figure_5_figure_supplement_1.pdf]

# Figure 6-figure supplement 1

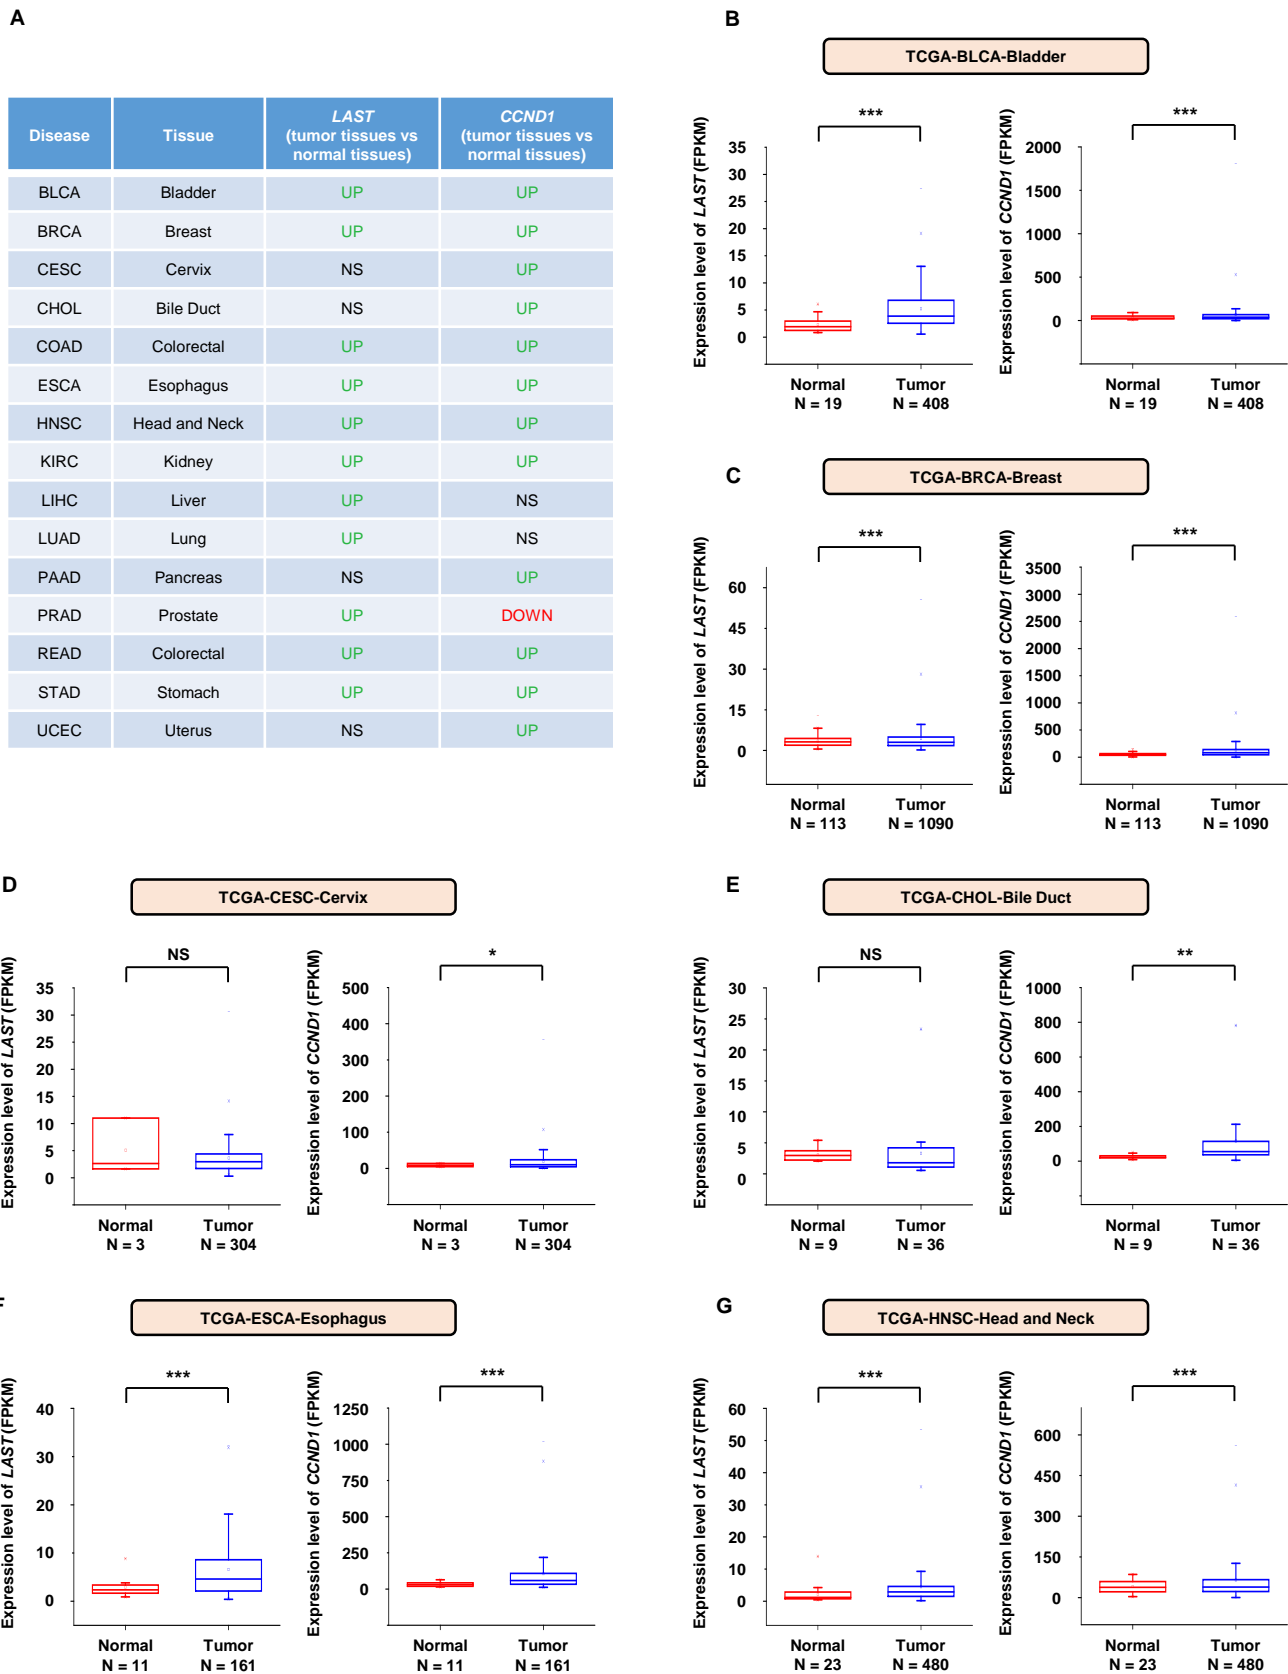

Supplement: supp [file elife_poa_e30433_Figure_6_figure_supplement_1.pdf › elife_poa_e30433_Figure_6_figure_supplement_1.pdf]

Figure 6-figure supplement 2

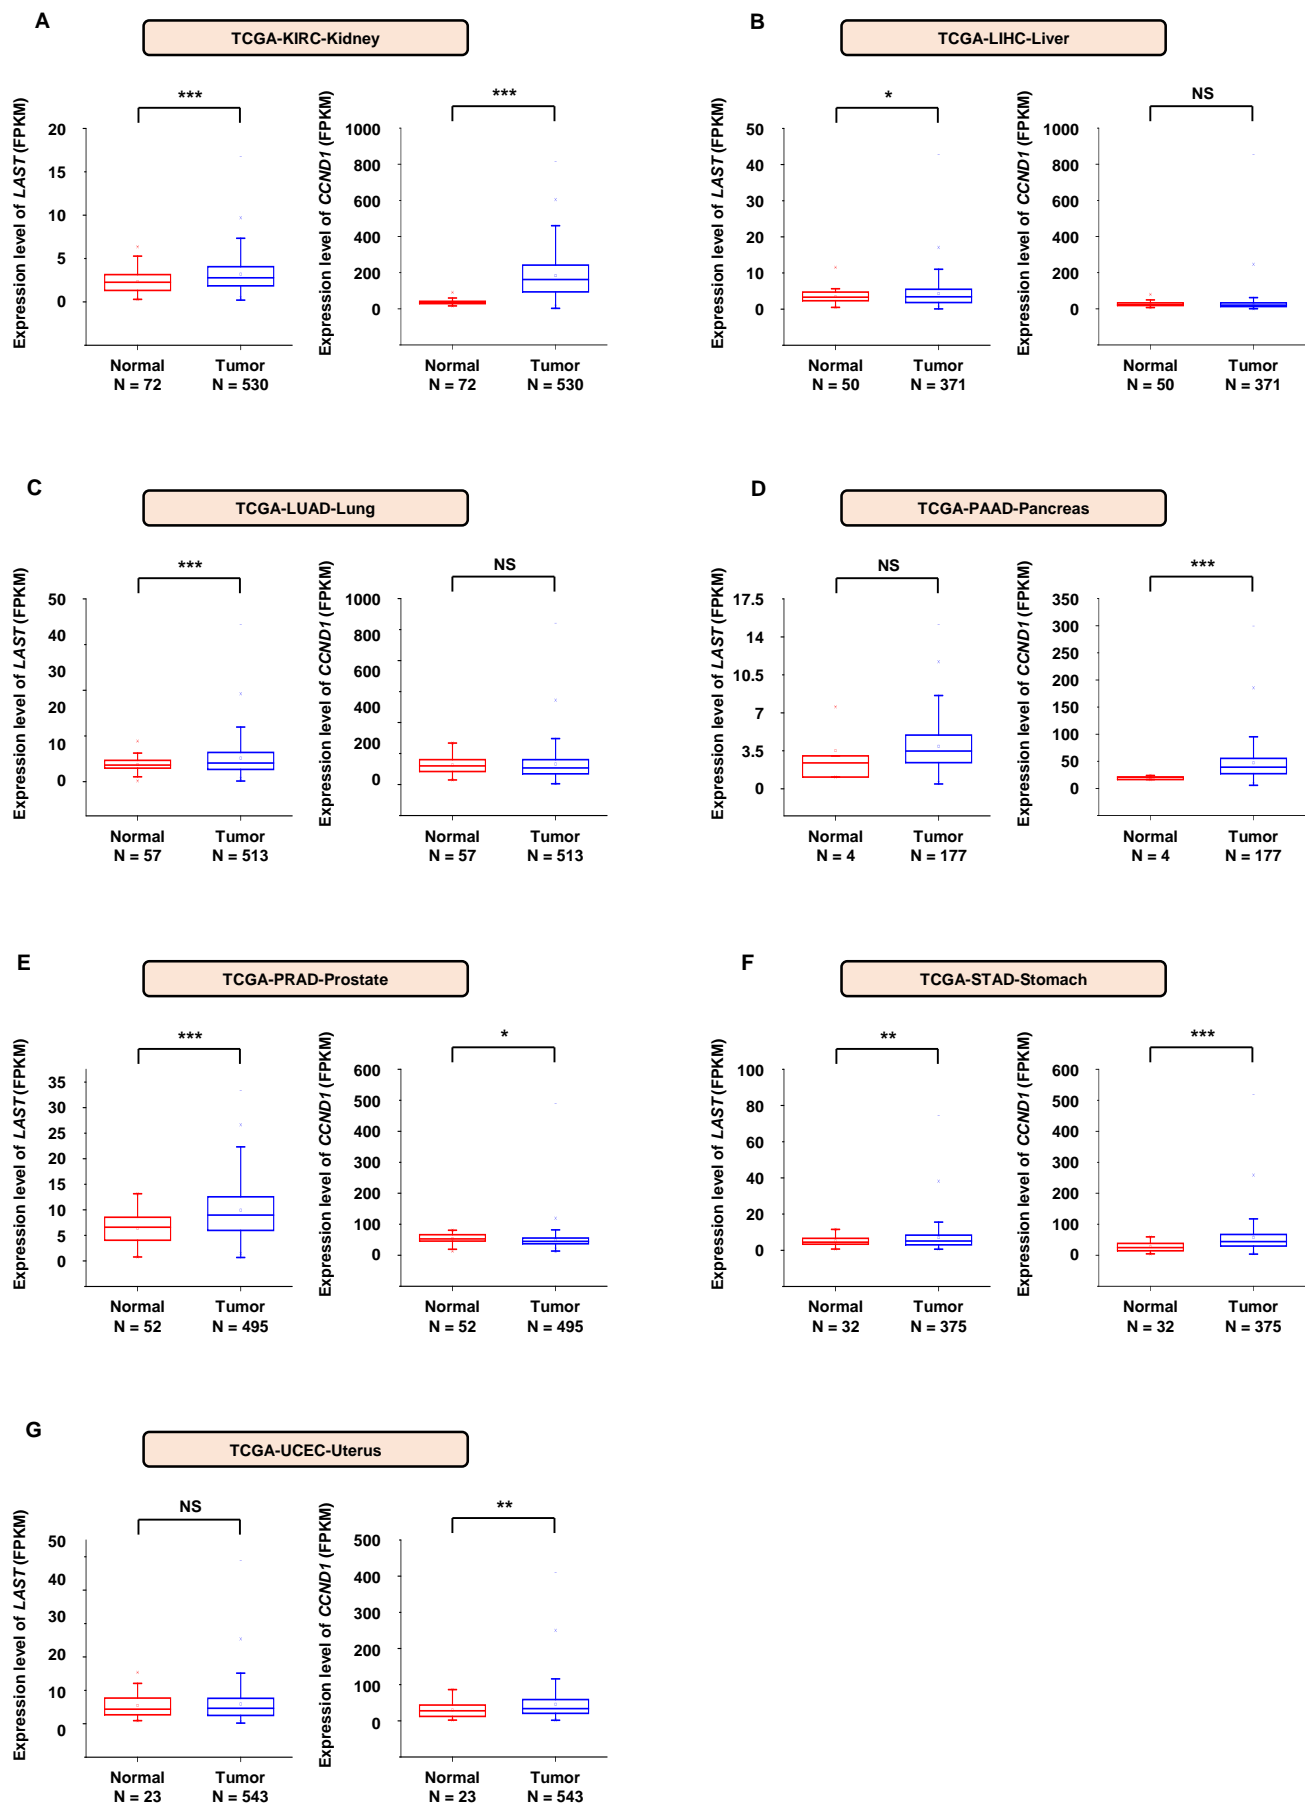

Supplement: supp [file elife_poa_e30433_Figure_6_figure_supplement_2.pdf › elife_poa_e30433_Figure_6_figure_supplement_2.pdf]
